# Supplementary material
Source: PubMed Central journal article supplement (PMC4027519)
Supplement: ml400382p_si_001.pdf [file ml400382p_si_001.pdf]

## Supporting Information

### Discovery of Small Molecule RIP1 Kinase Inhibitors for the Treatment of Pathologies Associated with Necrotic Cell Death

Philip A. Harris,<sup>\*†</sup> Deepak Bandyopadhyay,<sup>‡</sup> Scott B. Berger,<sup>†</sup> Nino Campobasso,<sup>‡</sup> Carol A. Capriotti,<sup>†</sup> Julie A. Cox,<sup>‡</sup> Lauren Dare,<sup>†</sup> Joshua N. Finger,<sup>†</sup> Sandra J. Hoffman,<sup>†</sup> Kirsten M. Kahler,<sup>§</sup> Ruth Lehr,<sup>‡</sup> John D. Lich,<sup>†</sup> Rakesh Nagilla,<sup>†</sup> Robert T. Nolte,<sup>§</sup> Michael T. Ouellette,<sup>‡</sup> Christina S. Pao,<sup>‡</sup> Michelle C. Schaeffer,<sup>†</sup> Angela Smallwood,<sup>‡</sup> Helen H. Sun,<sup>†</sup> Barbara A. Swift,<sup>†</sup> Rachel D. Totoritis,<sup>‡</sup> Paris Ward,<sup>‡</sup> Robert W. Marquis,<sup>†</sup> John Bertin<sup>†</sup> and Peter J. Gough<sup>†</sup>

<sup>†</sup>Pattern Recognition Receptor DPU and <sup>‡</sup>Platform Technology & Science, GlaxoSmithKline, Collegetown Road, Collegetown, Pennsylvania 19426, United States. <sup>§</sup>Platform Technology & Science, GlaxoSmithKline, Research Triangle Park, North Carolina, 27709, United States.

\*To whom correspondence should be addressed.

### Synthesis of compounds

Aminoisoquinolines **1-8** were made according to the Schemes 1 and the representative procedure detailed below. The preparation of compound **2** is reported in Washio, Y. Preparation of aryl substituted isoquinoline derivatives as inhibitors of VEGFR2, TIE-2, and EphB4. PCT Int. Appl. **2005**, WO2005049576.

#### Scheme 1

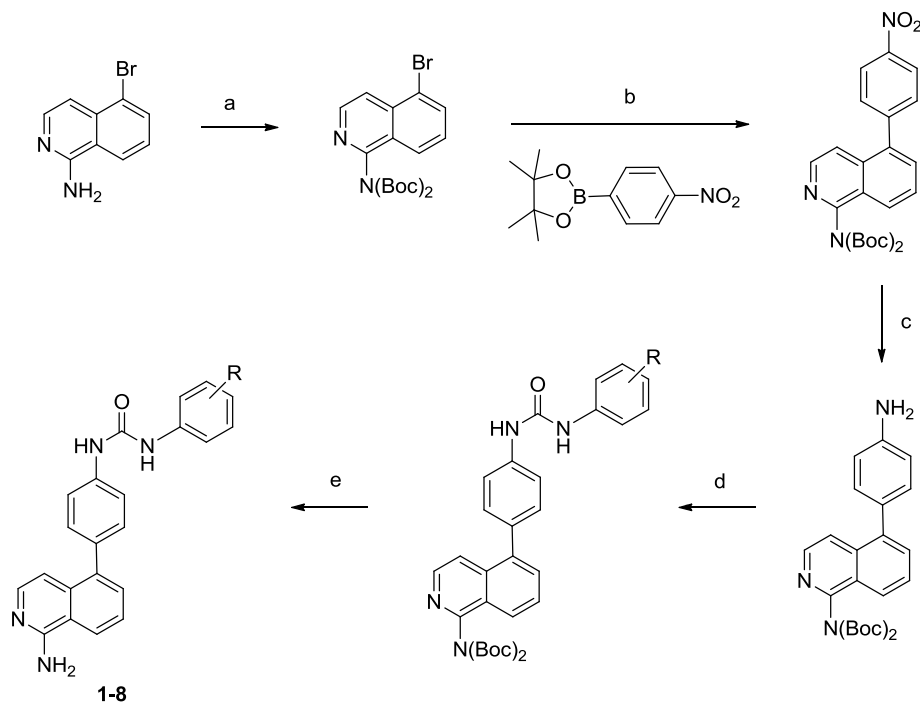

Reagents and conditions: (a)  $(\text{Boc})_2\text{O}$ , DMAP, TEA, MeCN, rt, 42% (b)  $\text{Pd}(\text{PPh}_3)_4$ ,  $\text{K}_3\text{PO}_4$ , DMF/water, microwave  $85^\circ\text{C}$ , 70% (c)  $\text{H}_2$ , Pd/C, EtOH, rt, 100% (d)  $\text{ArNCO}$ ,  $\text{CH}_2\text{Cl}_2$ , rt, 52-70% (e) TFA,  $\text{CH}_2\text{Cl}_2$ , rt, 42-90%

#### Preparation of bis(1,1-dimethylethyl) (5-bromo-1-isoquinolinyl)imidodicarbonate

To a solution of 5-bromoisoquinolin-1-amine (500 mg, 2.24 mmol),  $\text{Boc}_2\text{O}$  (1.56 ml, 6.72 mmol) and DMAP (55 mg, 0.45 mmol) and TEA (0.95 ml, 6.82 mmol) in acetonitrile (5 mL) was stirred at RT

for 5h. The reaction mixture was concentrated and the residue was purified by ISCO eluting with ethyl acetate/hexane (0-20%) to afford the title compound as (400 mg, 0.945 mmol, 42 % yield).

#### **Preparation of bis(1,1-dimethylethyl) [5-(4-nitrophenyl)-1-isoquinolinyl]imidodicarbonate**

A mixture of bis(1,1-dimethylethyl) (5-bromo-1-isoquinolinyl)imidodicarbonate (0.483 g, 1.14 mmol), 4,4,5,5-tetramethyl-2-(4-nitrophenyl)-1,3,2-dioxaborolane (0.426 g, 1.71 mmol) and potassium phosphate (0.727 g, 3.42 mmol) in N,N-dimethylformamide (12 mL) and water (4 mL) was degassed by bubbling nitrogen through for 5 minutes. Next, tetrakis(triphenylphosphine)palladium (0.04 g, 0.034 mmol) was added and the reaction microwaved at 85 °C for 30 minutes. Add a second equivalent of 4,4,5,5-tetramethyl-2-(4-nitrophenyl)-1,3,2-dioxaborolane (0.426 g, 1.712mmol) was then added and the reaction microwaves at 85 °C for additional 30 minutes. The reaction mixture was dilute with ethyl acetate and wash with water (2X), half-saturated brine (2X) and dried over MgSO<sub>4</sub> and concentrated. The crude sample was purified via Isco normal phase chromatography (24 g column, 0% -25%, ethyl acetate/hexane). The pure product containing-fractions were combined and concentrated leading to the product: (0.373 g, 0.80 mmol, 70 % yield) as a yellow solid.

#### **Preparation of bis(1,1-dimethylethyl) [5-(4-aminophenyl)-1-isoquinolinyl]imidodicarbonate**

A mixture of bis(1,1-dimethylethyl) [5-(4-nitrophenyl)-1-isoquinolinyl]imidodicarbonate (0.373 g, 0.80 mmol) and 10% Pd/C (0.086 g, 0.81 mmol) in ethanol (10 mL) was stirred at RT under a balloon of hydrogen overnight. The reaction mixture was filtered through a pad of celite and concentrated to yield a yellow oil (0.37 g, 100 % yield) which was used as such without further purification.

#### **Preparation of bis(1,1-dimethylethyl) (5-{4-[[[3-(trifluoromethyl)phenyl]amino}carbonyl]amino]-phenyl}-1-isoquinolinyl)imidodicarbonate**

A mixture of bis(1,1-dimethylethyl) [5-(4-aminophenyl)-1-isoquinolinyl]imidodicarbonate (0.07 g, 0.16 mmol) in dichloromethane (40 mL) was added 3-(trifluoromethyl)phenyl isocyanate (0.045 g, 0.24 mmol) and the solution stirred at RT for 15 hours. The reaction mixture was concentrated and the crude sample was purified via Isco normal phase chromatography (24 g column, 1:4 ethyl acetate/hexane). The pure product containing-fractions were combined and concentrated leading to the product: (0.07 g, 70 % yield) as a colorless oil.

#### **Preparation of 1-(4-(1-aminoisoquinolin-5-yl)phenyl)-3-(3-(trifluoromethyl)phenyl)urea; Compound 1**

To a mixture of bis(1,1-dimethylethyl) (5-{4-[[[3-(trifluoromethyl)phenyl]amino}carbonyl]amino]-phenyl}-1-isoquinolinyl)imidodicarbonate (0.07 g, 0.11 mmol) in dichloromethane (1 mL) was added trifluoroacetic acid (4 mL) and the solution stirred at RT for 14 hours. The reaction mixture was concentrated and sodium bicarbonate solution (5 mL) was added. The resulting white solid suspension was filtered off, washed with water and dried to give the product (0.048 g, 78 % yield) as a white solid.

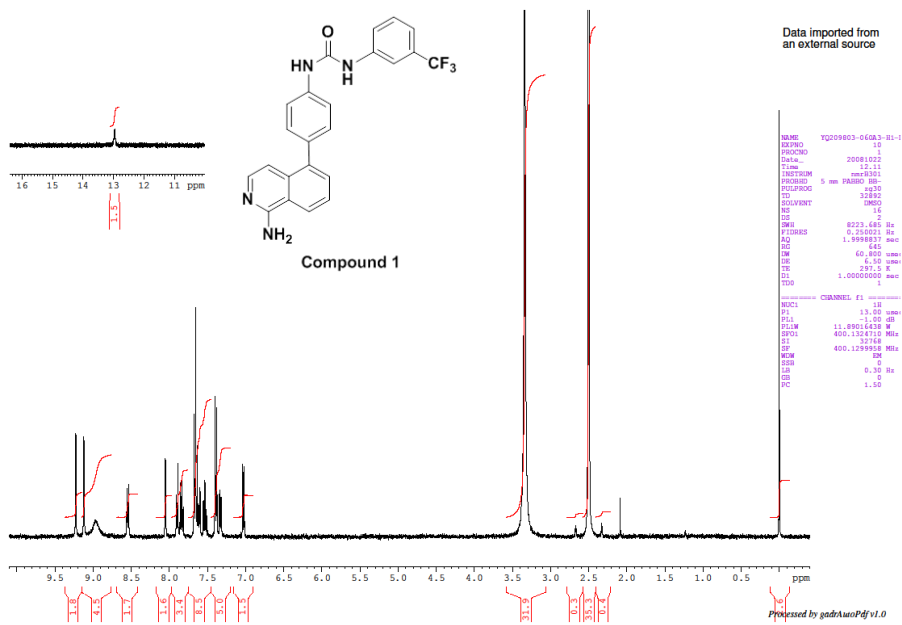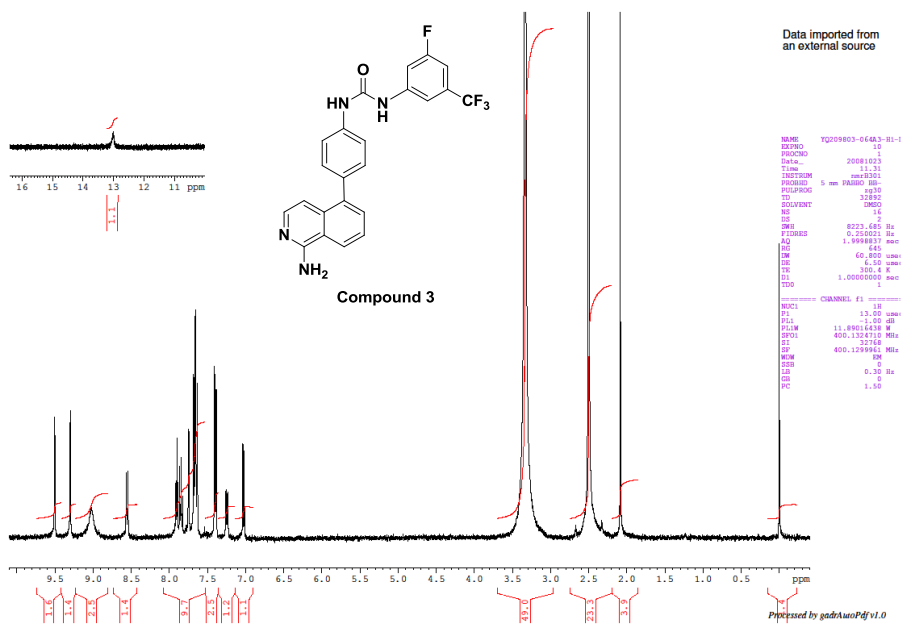

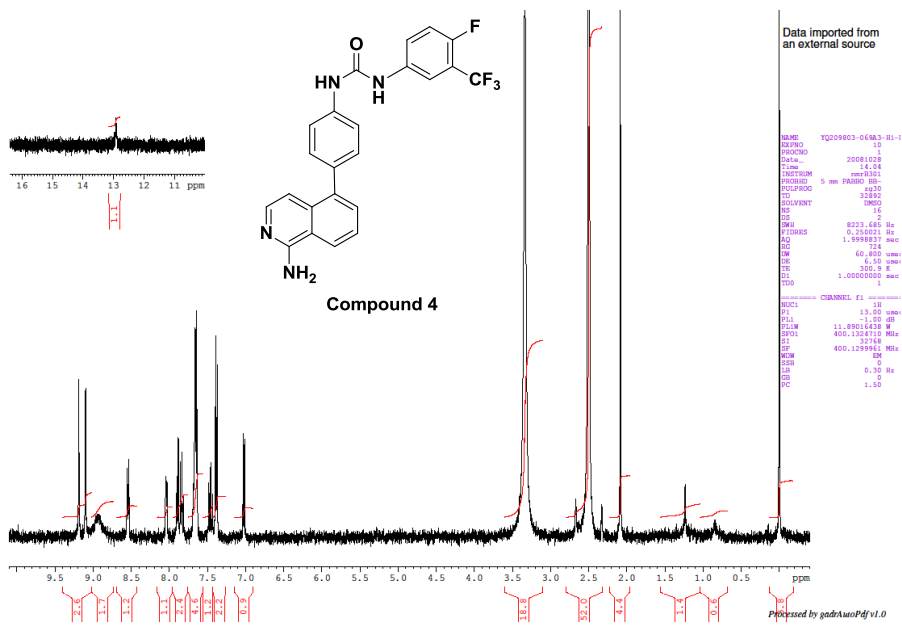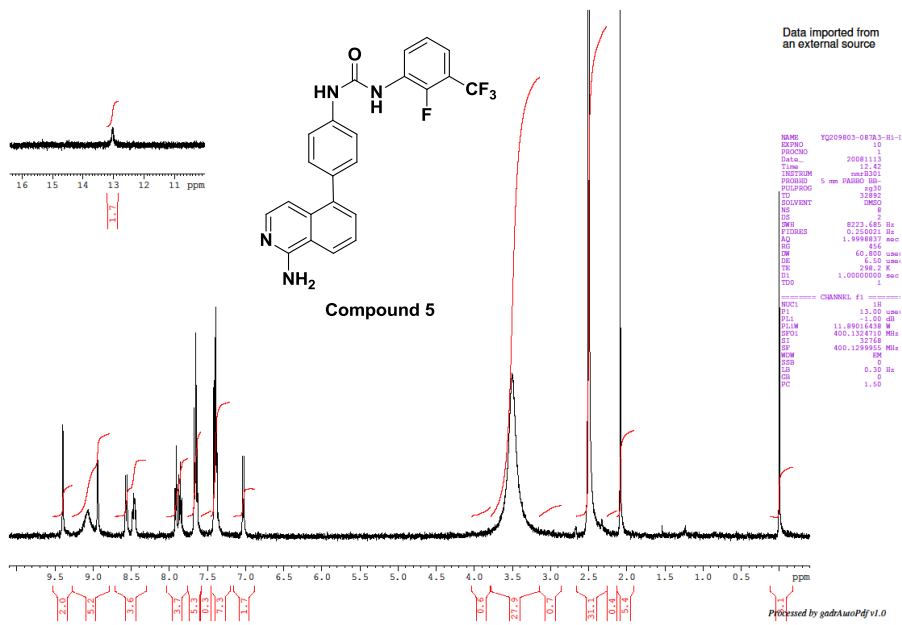

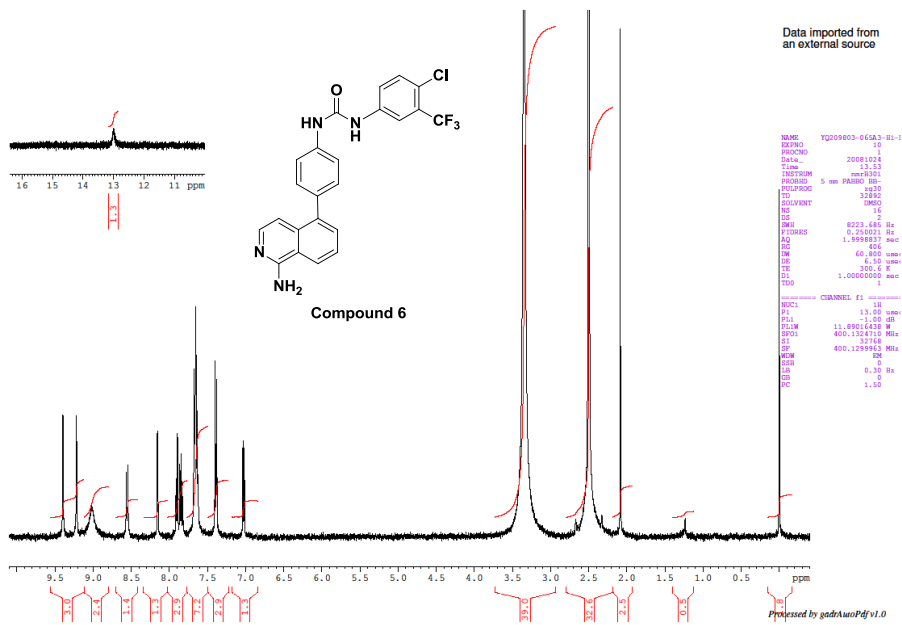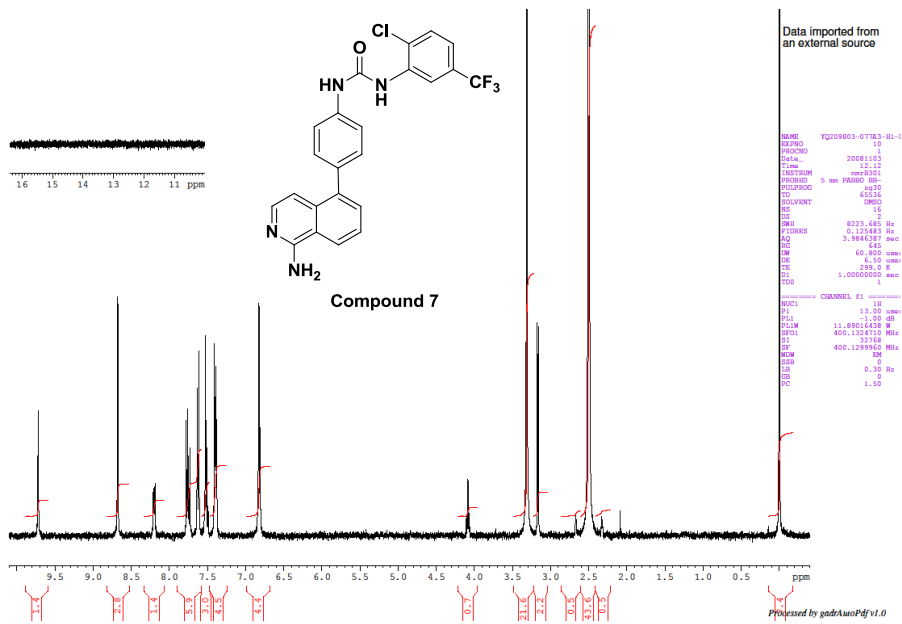

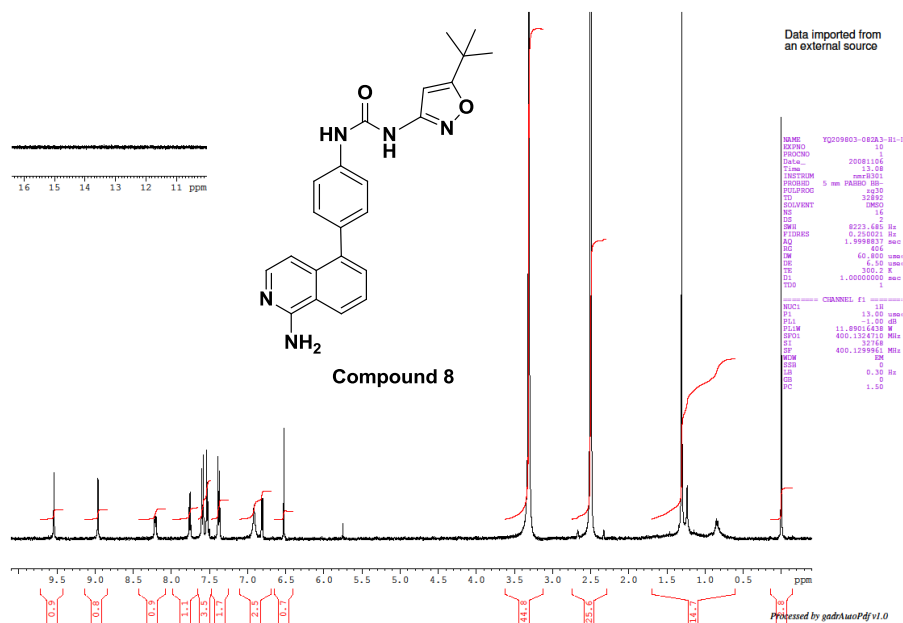

Compounds **9-16** were made according to the Schemes 2 and the representative procedure detailed below.

### Scheme 2

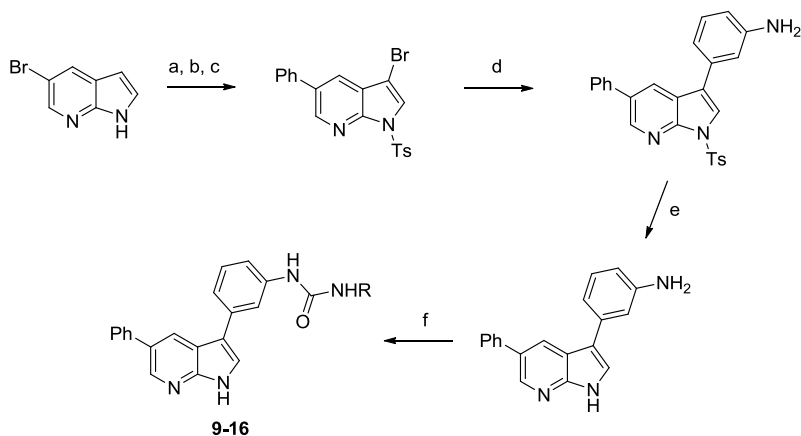

Reagents and conditions: (a)  $\text{PhB}(\text{OH})_2$ ,  $\text{Pd}(\text{dppf})\text{Cl}_2$ ,  $\text{K}_2\text{CO}_3$ , dioxane/water, 99%; (b)  $\text{Br}_2$ ,  $\text{CHCl}_3$ ; (c)  $\text{TsCl}$ ,  $\text{Bu}_4\text{NSO}_4$ ,  $\text{CH}_2\text{Cl}_2$ , 6N  $\text{NaOH}$ , 68% for 2 steps; (d) 3-aminophenylboronic acid,  $\text{Pd}(\text{PPh}_3)_4$ ,  $\text{Na}_2\text{CO}_3$ , DMF, 120 °C, 92%; (e)  $\text{KOH}$ , MeOH, 92%; (f)  $\text{RNCO}$ ,  $\text{Et}_3\text{N}$ ,  $\text{CH}_2\text{Cl}_2$ , 60–90%

### Preparation of 5-Phenyl-1 H-pyrrolo[2,3-b]pyridine.

[1,1'-Bis(diphenylphosphino)ferrocene]dichloropalladium(II) (1.04 g, 1.27 mmol) was added in one portion to a suspension of 5-bromo-1 H-pyrrolo[2,3-b]pyridine (5 g, 25.4 mmol), phenylboronic acid (3.7 g, 30.5 mmol) and potassium carbonate (1.05 g, 76.1 mmol) in 2.5:1 dioxane/water (253 mL). The reaction mixture was placed under  $\text{N}_2$  atmosphere and heated in an oil bath set to 80 °C. After heating for 22.5 hours, the reaction mixture was cooled to room temperature, acidified with 6N HCl, and partitioned between ethyl acetate (100 mL) and water (100 mL). The mixture was filtered through a pad of Celite, and the layers of the filtrate were separated. The aqueous layer was extracted with ethyl acetate (2 X 50 mL portions). The combined organics were washed with saturated aqueous sodium chloride (100 mL), dried over sodium sulfate and concentrated. The residue was dissolved in methanol (200 mL), 15g of DOWEX 50WX2-400 ion exchange resin was added, and the mixture was stirred gently

for 3 hours. The resin was collected by filtration and washed with methanol (2 X 100 mL portions), dichloromethane (100 mL), and methanol (100 mL). The product was released from the resin by washing with 4N ammonia in methanol (3 X 100 mL portions). The 4N ammonia methanol washings were concentrated in vacuo to provide 5-phenyl-1H-pyrrolo[2,3-b]pyridine as a light brown solid (4.86 g, 99%). <sup>1</sup>H NMR (400 MHz, CDCl<sub>3</sub>) 10.33 (br s, 1H), 8.62 (s, 1H), 8.22 (s, 1H), 7.66 (d, J = 8 Hz, 2H), 7.52 (t, J = 7.6 Hz, 2H), 7.43 (m, 2H), 6.62 (s, 1H). LC-MS (ES) m/e 195 (M + H)<sup>+</sup>.

#### **Preparation of 3-bromo-5-phenyl-1H-pyrrolo[2,3-b]pyridine**

Bromine (1.27 mL, 3.95 g, 24.7 mmol) was added over a period of 35 minutes to a solution of 5-phenyl-1H-pyrrolo[2,3-b]pyridine (4.8 g, 24.7 mmol) in chloroform (247 mL). The reaction mixture was stirred at room temperature for 15 min. and then concentrated in vacuo. The pale orange foam containing 3-bromo-5-phenyl-1H-pyrrolo[2,3-b]pyridine was carried directly to the next reaction without further purification.

#### **Preparation of 3-bromo-5-phenyl-1-tosyl-1H-pyrrolo[2,3-b]pyridine**

Tetrabutylammonium hydrogen sulfate (100 mg, catalytic) was added to a mixture of 3-bromo-5-phenyl-1H-pyrrolo[2,3-b]pyridine (24.7 mmol, 1 equiv) and p-toluenesulfonylchloride (5.65 g, 29.6 mmol) in a bilayer of dichloromethane (308 mL) and 6N NaOH (50 mL). The reaction mixture was stirred for 1 hour and then diluted with water (100 mL). The reaction mixture was filtered through a plug of Celite, and the filtrate layers were separated. The aqueous layer was extracted with dichloromethane (100 mL). The combined organics were dried over sodium sulfate and were concentrated. Purification of the residue by ISCO chromatography (eluting with dichloromethane, with a gradient of 0-10% ethyl acetate) afforded 3-bromo-1-[(4methylphenyl)sulfonyl]-5-phenyl-1H-pyrrolo[2,3-b]pyridine (7.19 g, 68% over two steps) as a tan solid. <sup>1</sup>H NMR (400 MHz, CDCl<sub>3</sub>) 8.71 (s, 1H), 8.12 (d, J = 8, 2H), 7.97 (s, 1H), 7.84 (s, 1H), 7.60 (d, J = 7.2 Hz, 2H), 7.51 (t, J = 7.6 Hz, 2H), 7.42 (t, J = 6.8 Hz, 1H), 7.32 (d, J = 8.4 Hz, 2H), 2.41 (s, 3H). LC-MS (ES) m/e 427 (M + H)<sup>+</sup>.

#### **Preparation of 3-(5-phenyl-1H-pyrrolo[2,3-b]pyridin-3-yl)aniline.**

To a solution of 3-bromo-1-[(4methylphenyl)sulfonyl]-5-phenyl-1H-pyrrolo[2,3-b]pyridine (1 g, 2.34 mmol) in DMF (18 mL) was added 3-aminophenylboronic acid (0.47 g, 3.04 mmol), tetrakis(triphenylphosphine)palladium(0) (0.277 g, 0.24 mmol) and saturated aqueous sodium carbonate (3 mL) and microwaved at 120 °C with stirring for 10 minutes. The combined organics were dried over sodium sulfate and were concentrated. The product was isolated by SCX cartridge via capture and release reaction: a SCX cartridge was rinsed with MeOH, and the crude mixture was dissolved in MeOH and loaded on the cartridge. The cartridge was rinsed with methanol and dichloromethane successively. The product was released by eluting with a 2M ammonia solution in methanol, followed by concentration in vacuo. Purification of the residue by ISCO chromatography (eluting with dichloromethane) afforded 3-(5-phenyl-1H-pyrrolo[2,3-b]pyridin-3-yl)aniline (0.95 g, 92% yield).

#### **Preparation of 1-(2-fluoro-5-(trifluoromethyl)phenyl)-3-(3-(5-phenyl-1H-pyrrolo[2,3-b]pyridin-3-yl)phenyl)urea (Compound 12)**

3-(5-Phenyl-1H-pyrrolo[2,3-b]pyridin-3-yl)aniline (0.02 g, 0.07 mmol) in THF (5 mL) was treated with 3-(trifluoromethyl)phenyl isocyanate (0.016 g, 0.077 mmol) and the solution stirred at RT for 16 hours.

The product was isolated by SCX cartridge via capture and release reaction as described previously:  
(0.024 g, 70 % yield).

10/25/2013 4:43:54 PM

|                        |                                                                 |                        |                      |
|------------------------|-----------------------------------------------------------------|------------------------|----------------------|
| Acquisition Time (sec) | 3.9584                                                          | Comment                | ph20153 R9738-27-1   |
| Date                   | 30 Aug 2013 12:00:00                                            | Date Stamp             | 30 Aug 2013 12:00:00 |
| File Name              | \\uptsfshr01\sa200200355\2013\8-30-2013\R9738-27-1\10\data\111r |                        |                      |
| Frequency (MHz)        | 400.15                                                          | Nucleus                | <sup>1</sup> H       |
| Origin                 | up2w                                                            | Original Points Count  | 32768                |
| Points Count           | 32768                                                           | Pulse Sequence         | zg30                 |
| SW(cyclical) (Hz)      | 8278.15                                                         | Solvent                | DMSO-d6              |
| Sweep Width (Hz)       | 8277.89                                                         | Temperature (degree C) | 25.900               |
|                        |                                                                 | Number of Transients   | 128                  |
|                        |                                                                 | Owner                  | nmsru                |
|                        |                                                                 | Receiver Gain          | 128.00               |
|                        |                                                                 | Spectrum Offset (Hz)   | 2471.0894            |

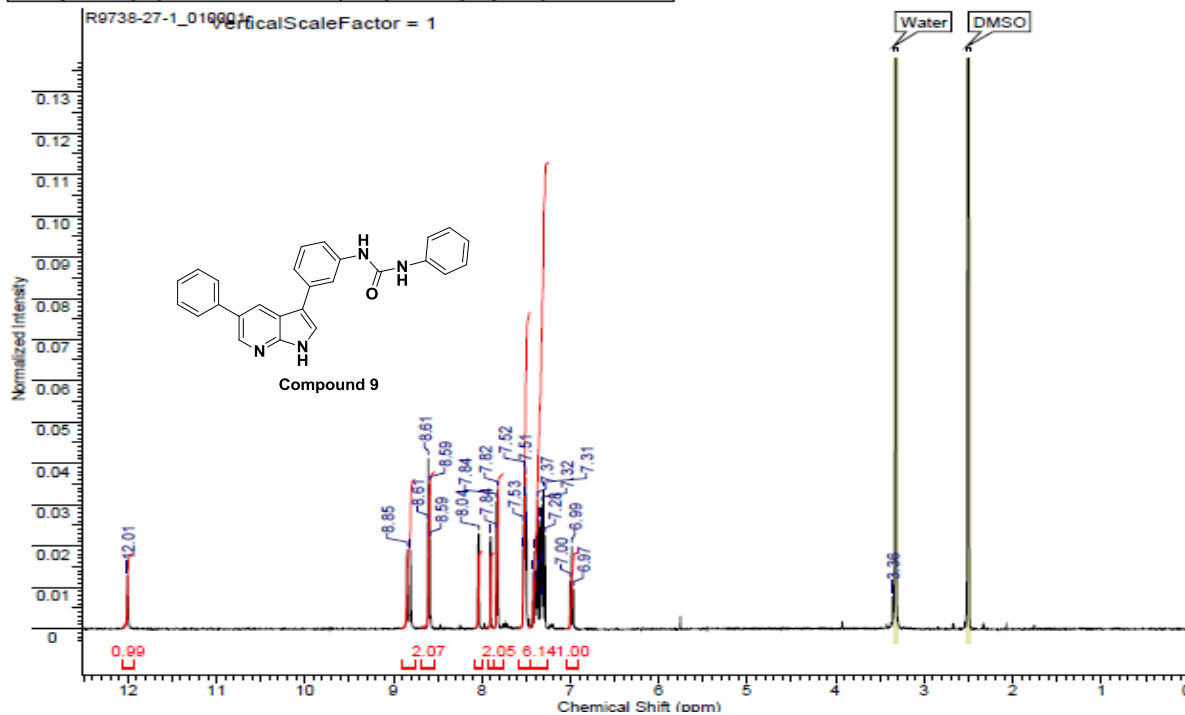

|                        |                                                                 |                        |                      |
|------------------------|-----------------------------------------------------------------|------------------------|----------------------|
| Acquisition Time (sec) | 3.9584                                                          | Comment                | ph20153 R9738-34-6   |
| Date                   | 30 Aug 2013 13:01:52                                            | Date Stamp             | 30 Aug 2013 13:01:52 |
| File Name              | \\uptsfshr01\sa200200355\2013\8-30-2013\R9738-34-6\10\data\111r |                        |                      |
| Frequency (MHz)        | 400.15                                                          | Nucleus                | <sup>1</sup> H       |
| Origin                 | up2w                                                            | Original Points Count  | 32768                |
| Points Count           | 32768                                                           | Pulse Sequence         | zg30                 |
| SW(cyclical) (Hz)      | 8278.15                                                         | Solvent                | DMSO-d6              |
| Sweep Width (Hz)       | 8277.89                                                         | Temperature (degree C) | 25.700               |
|                        |                                                                 | Number of Transients   | 128                  |
|                        |                                                                 | Owner                  | nmsru                |
|                        |                                                                 | Receiver Gain          | 128.00               |
|                        |                                                                 | Spectrum Offset (Hz)   | 2471.0894            |

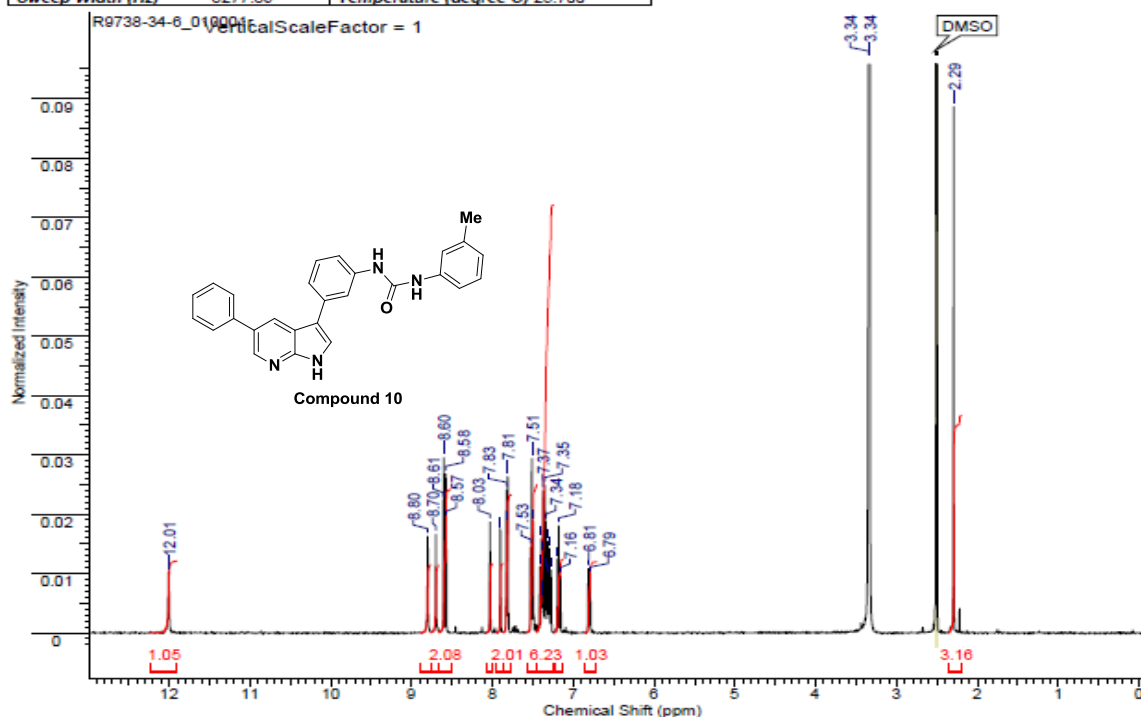



|                        |                                                                 |                        |                      |
|------------------------|-----------------------------------------------------------------|------------------------|----------------------|
| Acquisition Time (sec) | 3.9584                                                          | Comment                | ph20153 R9738-30-3   |
| Date                   | 30 Aug 2013 12:46:56                                            | Date Stamp             | 30 Aug 2013 12:46:56 |
| File Name              | \\uptsfshr01\sa200200355\2013\8-30-2013\R9738-30-3\10\data\1\1r |                        |                      |
| Frequency (MHz)        | 400.15                                                          | Nucleus                | <sup>1</sup> H       |
| Origin                 | up2w                                                            | Original Points Count  | 32768                |
| Points Count           | 32768                                                           | Pulse Sequence         | zg30                 |
| SW(cyclical) (Hz)      | 8278.15                                                         | Solvent                | DMSO-d6              |
| Sweep Width (Hz)       | 8277.89                                                         | Temperature (degree C) | 25.700               |
|                        |                                                                 | Number of Transients   | 128                  |
|                        |                                                                 | Owner                  | nmrsu                |
|                        |                                                                 | Receiver Gain          | 128.00               |
|                        |                                                                 | Spectrum Offset (Hz)   | 2471.0894            |

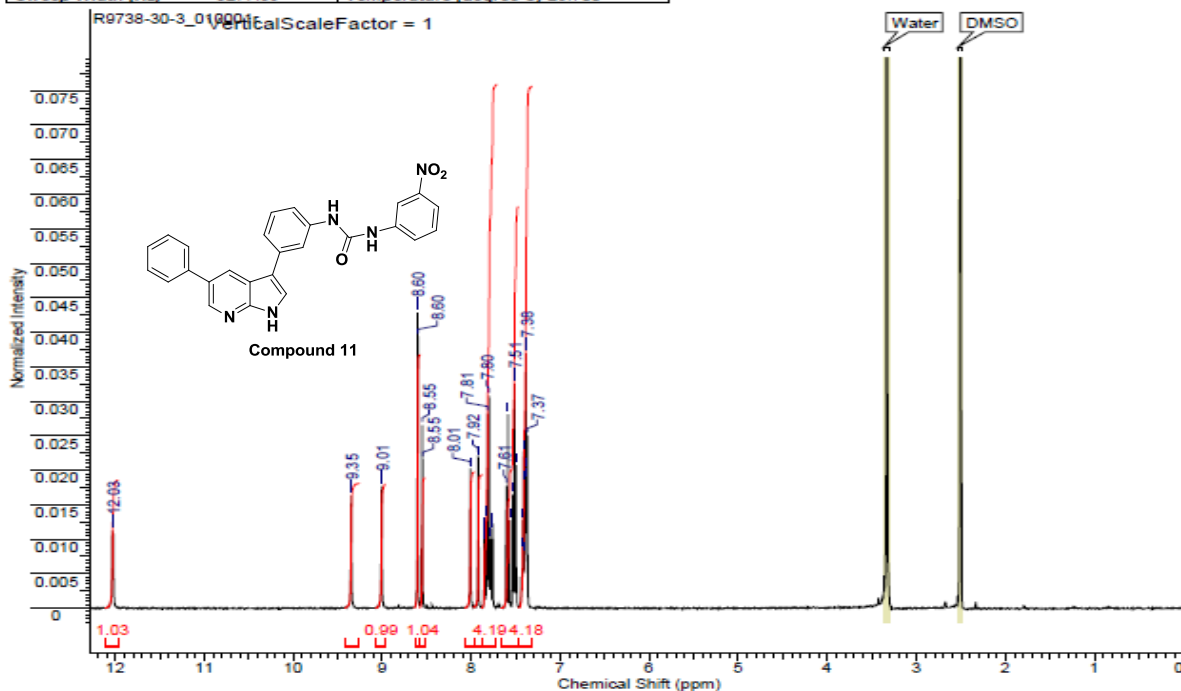

|                        |                                                                 |                        |                      |
|------------------------|-----------------------------------------------------------------|------------------------|----------------------|
| Acquisition Time (sec) | 3.9584                                                          | Comment                | ph20153 R9738-30-1   |
| Date                   | 30 Aug 2013 13:16:48                                            | Date Stamp             | 30 Aug 2013 13:16:48 |
| File Name              | \\uptsfshr01\sa200200355\2013\8-30-2013\R9738-30-1\10\data\1\1r |                        |                      |
| Frequency (MHz)        | 400.15                                                          | Nucleus                | <sup>1</sup> H       |
| Origin                 | up2w                                                            | Original Points Count  | 32768                |
| Points Count           | 32768                                                           | Pulse Sequence         | zg30                 |
| SW(cyclical) (Hz)      | 8278.15                                                         | Solvent                | DMSO-d6              |
| Sweep Width (Hz)       | 8277.89                                                         | Temperature (degree C) | 25.700               |
|                        |                                                                 | Number of Transients   | 128                  |
|                        |                                                                 | Owner                  | nmrsu                |
|                        |                                                                 | Receiver Gain          | 128.00               |
|                        |                                                                 | Spectrum Offset (Hz)   | 2471.0894            |

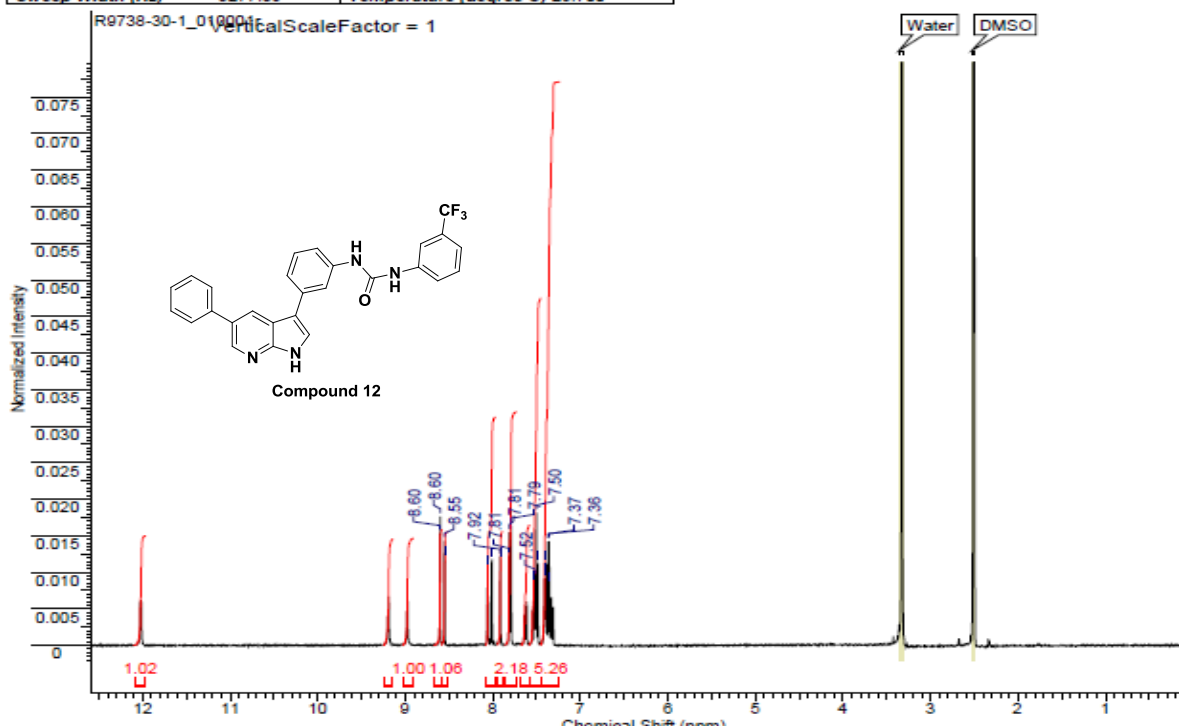

|                        |                                                                     |                        |                      |                      |           |
|------------------------|---------------------------------------------------------------------|------------------------|----------------------|----------------------|-----------|
| Acquisition Time (sec) | 3.9584                                                              | Comment                | ph20153 R9738-34-4   |                      |           |
| Date                   | 30 Aug 2013 12:14:56                                                | Date Stamp             | 30 Aug 2013 12:14:56 |                      |           |
| File Name              | \u005cuptsfshr01\sa200200355\2013\8-30-2013\R9738-34-4\10\data\1\1r |                        |                      |                      |           |
| Frequency (MHz)        | 400.15                                                              | Nucleus                | 1H                   | Number of Transients | 128       |
| Origin                 | up2w                                                                | Original Points Count  | 32768                | Owner                | nmrsu     |
| Points Count           | 32768                                                               | Pulse Sequence         | zg30                 | Receiver Gain        | 128.00    |
| SW(cyclical) (Hz)      | 8278.15                                                             | Solvent                | DMSO-d6              | Spectrum Offset (Hz) | 2471.0894 |
| Sweep Width (Hz)       | 8277.89                                                             | Temperature (degree C) | 25.800               |                      |           |

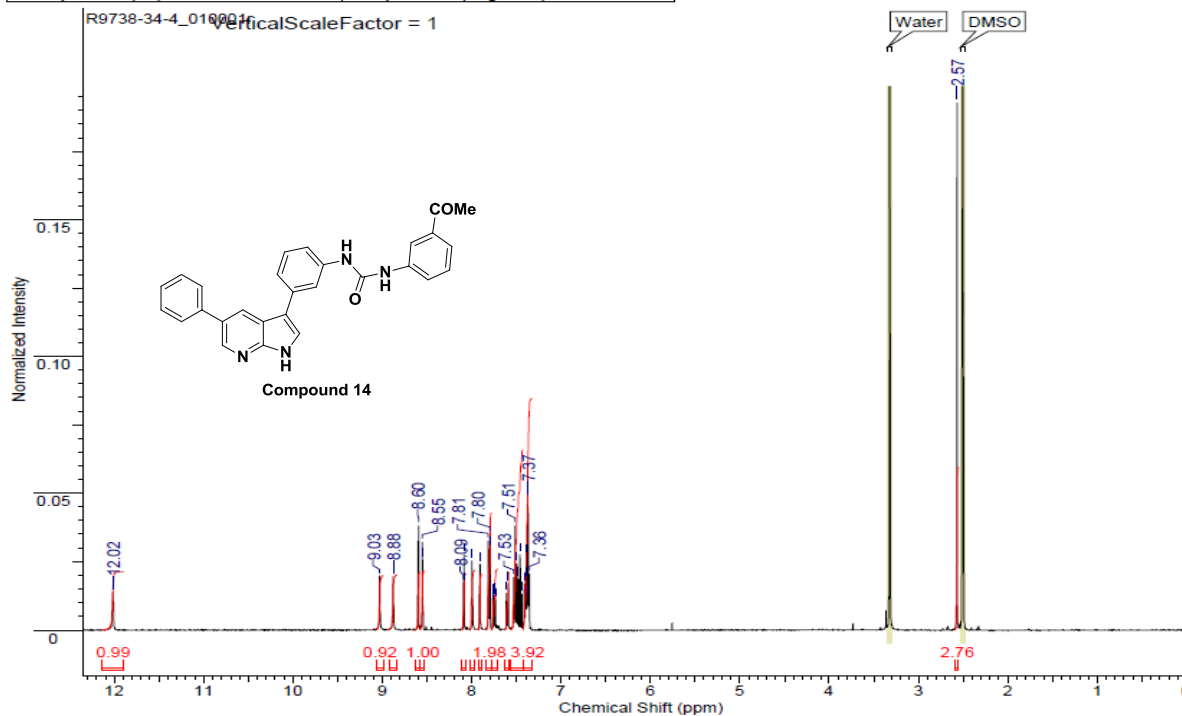

|                        |                                                                     |                        |                      |                      |           |
|------------------------|---------------------------------------------------------------------|------------------------|----------------------|----------------------|-----------|
| Acquisition Time (sec) | 3.9584                                                              | Comment                | ph20153 R9738-30-4   |                      |           |
| Date                   | 30 Aug 2013 12:32:00                                                | Date Stamp             | 30 Aug 2013 12:32:00 |                      |           |
| File Name              | \u005cuptsfshr01\sa200200355\2013\8-30-2013\R9738-30-4\10\data\1\1r |                        |                      |                      |           |
| Frequency (MHz)        | 400.15                                                              | Nucleus                | 1H                   | Number of Transients | 128       |
| Origin                 | up2w                                                                | Original Points Count  | 32768                | Owner                | nmrsu     |
| Points Count           | 32768                                                               | Pulse Sequence         | zg30                 | Receiver Gain        | 128.00    |
| SW(cyclical) (Hz)      | 8278.15                                                             | Solvent                | DMSO-d6              | Spectrum Offset (Hz) | 2471.0894 |
| Sweep Width (Hz)       | 8277.89                                                             | Temperature (degree C) | 25.800               |                      |           |

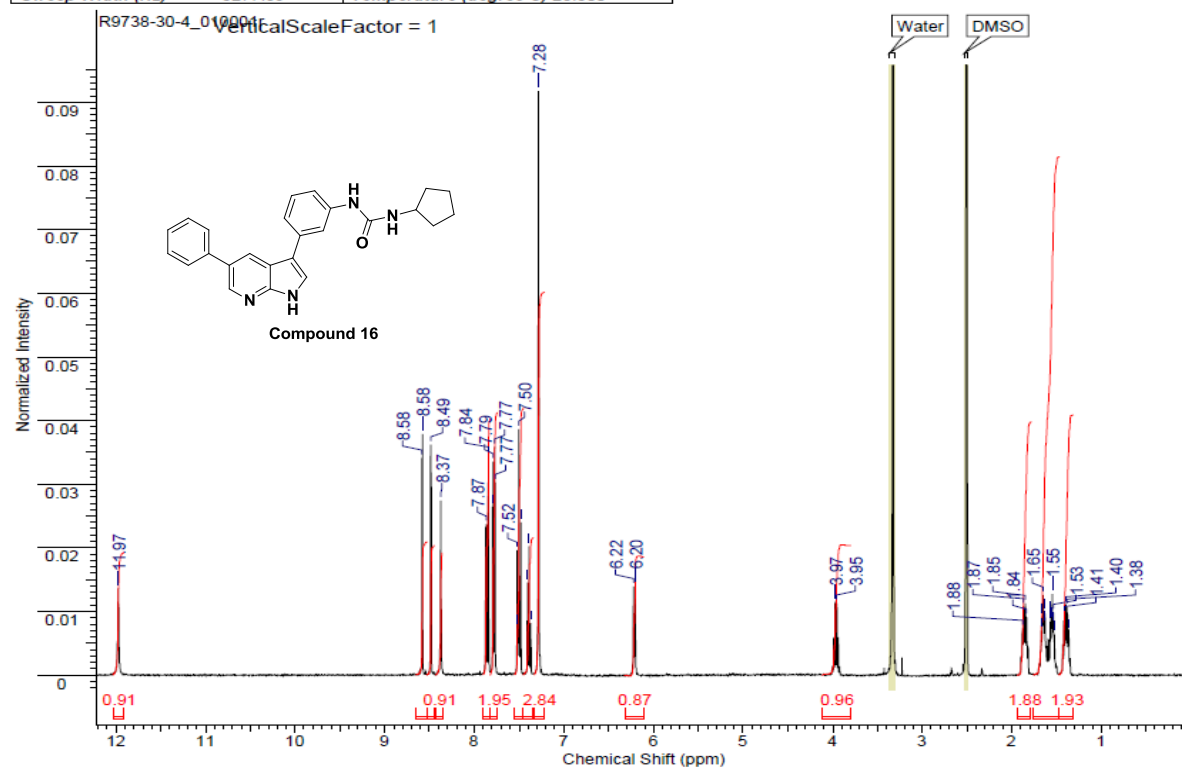

Compounds **17-23** were made according to the Schemes 3 and the representative procedure detailed below. The 3-bromo-5-aryl-1H-pyrrolo[2,3-b]pyridines were obtained following the steps described above for 3-bromo-5-phenyl-1-tosyl-1H-pyrrolo[2,3-b]pyridine.

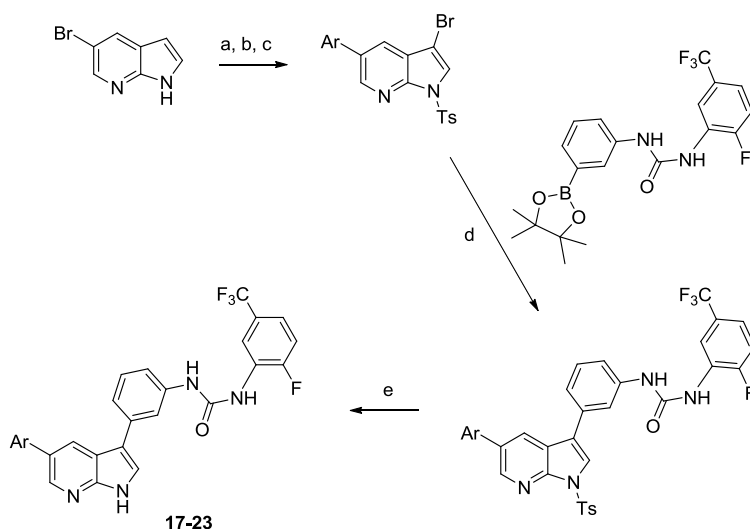

Reagents and conditions: (a)  $\text{ArB}(\text{OH})_2$ ,  $\text{Pd}(\text{dppf})\text{Cl}_2$ ,  $\text{K}_2\text{CO}_3$ , dioxane/water; (b)  $\text{Br}_2$ ,  $\text{CHCl}_3$ ; (c)  $\text{TsCl}$ ,  $\text{Bu}_4\text{NSO}_4$ ,  $\text{CH}_2\text{Cl}_2$ , 6N  $\text{NaOH}$ ; (d)  $\text{Pd}(\text{PPh}_3)_4$ ,  $\text{Na}_2\text{CO}_3$ , DME, 120 °C; (e)  $\text{NaOH}$ ,  $\text{MeOH}$ ;

#### Preparation of 1-(2-fluoro-5-(trifluoromethyl)phenyl)-3-(3-(5-aryl-1-tosyl-1H-pyrrolo[2,3-b]pyridin-3-yl)phenyl)urea.

3-Bromo-5-aryl-1H-pyrrolo[2,3-b]pyridines (0.1 mmol) and N-[2-fluoro-5-(trifluoromethyl)phenyl]-N-[3-(4,4,5,5-tetramethyl-1,3,2-dioxaborolan-2-yl)phenyl]urea (55 mg, 0.13 mmol) were dissolved in DME (1 mL) and aqueous  $\text{Na}_2\text{CO}_3$  (2M, 0.25 mL). To the resulting solution was added  $\text{Pd}(\text{PPh}_3)_4$  (10 mol%) and the reaction mixture was microwaved at 120 °C for 15 min. The mixture was then filtered through Celite and washed with MeOH. The crude compound in methanol was carried on to the next step as such.

#### Preparation of 1-(2-fluoro-5-(trifluoromethyl)phenyl)-3-(3-(5-aryl-1H-pyrrolo[2,3-b]pyridin-3-yl)phenyl)urea

To the crude solution of 1-(2-fluoro-5-(trifluoromethyl)phenyl)-3-(3-(5-aryl-1-tosyl-1H-pyrrolo[2,3-b]pyridin-3-yl)phenyl)urea in methanol was added 6N  $\text{NaOH}_{(\text{aq})}$  (0.1 mL). The resulting solution was stirred at 50 °C for 1 hour. The reaction mixture was dilute with water, extracted with dichloromethane (2X) and the organic phase dried over  $\text{MgSO}_4$  and concentrated. The crude sample was purified via a mass directed auto purification HPLC/MS system to give the title compound.

|                        |                                                               |                        |                      |
|------------------------|---------------------------------------------------------------|------------------------|----------------------|
| Acquisition Time (sec) | 3.9584                                                        | Comment                | PH20153 GSK651814A   |
| Date                   | 06 Sep 2013 16:22:24                                          | Date Stamp             | 06 Sep 2013 16:22:24 |
| File Name              | \\uptsfshr01\sa2002003552013\9-6-2013\11459-34-38\10\data\11r |                        |                      |
| Frequency (MHz)        | 400.15                                                        | Nucleus                | <sup>1</sup> H       |
| Origin                 | up2w                                                          | Original Points Count  | 32768                |
| Points Count           | 32768                                                         | Pulse Sequence         | zg30                 |
| SW(cyclical) (Hz)      | 8278.15                                                       | Solvent                | DMSO-d6              |
| Sweep Width (Hz)       | 8277.89                                                       | Temperature (degree C) | 26.100               |
|                        |                                                               | Number of Transients   | 128                  |
|                        |                                                               | Owner                  | nmrsu                |
|                        |                                                               | Receiver Gain          | 128.00               |
|                        |                                                               | Spectrum Offset (Hz)   | 2471.0894            |

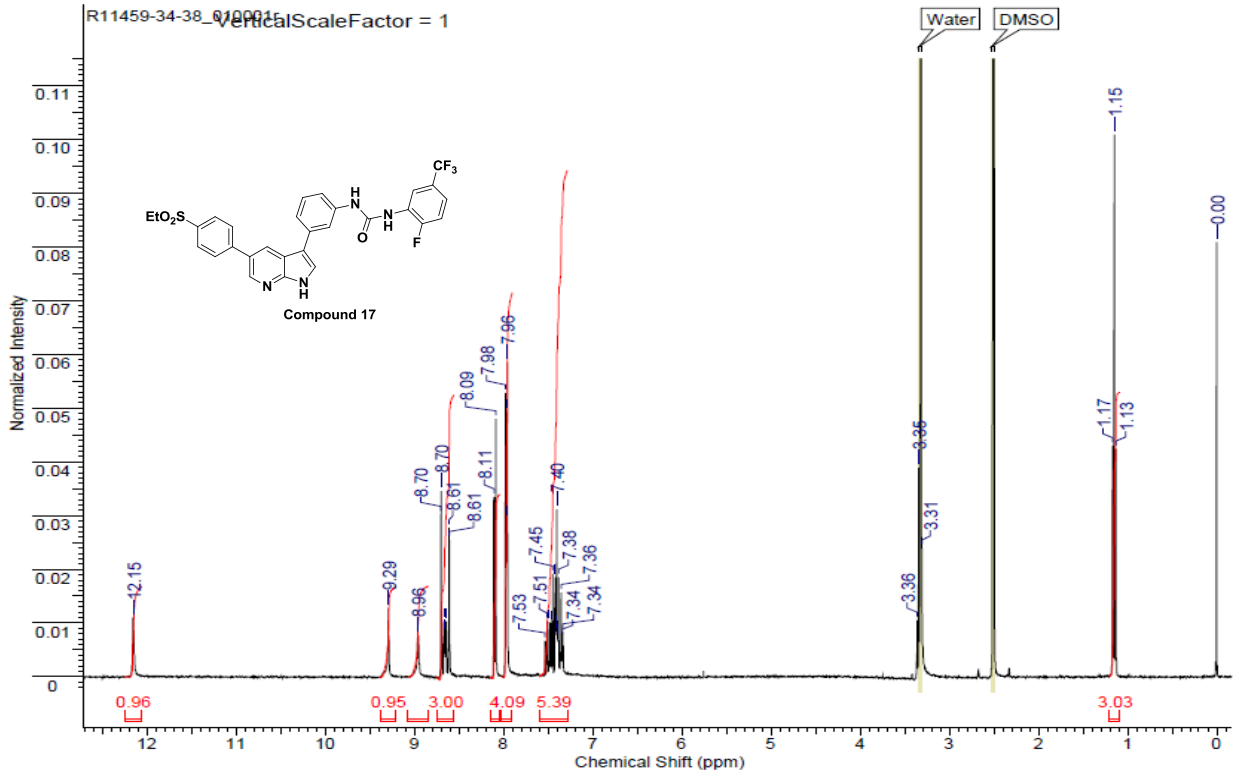

|                        |                                                               |                        |                     |
|------------------------|---------------------------------------------------------------|------------------------|---------------------|
| Acquisition Time (sec) | 3.7440                                                        | Comment                | u22695-52-1 mx#n_H1 |
| Date                   | Sep 16 2005                                                   | Date Stamp             | Sep 16 2005         |
| File Name              | C:\DOCUME~1\PH20153\LOCALS~1\TEMP\U22695-52-1 MX_N_H1.FID\FID |                        |                     |
| Frequency (MHz)        | 399.94                                                        | Nucleus                | <sup>1</sup> H      |
| Original Points Count  | 22466                                                         | Points Count           | 32768               |
| Receiver Gain          | 60.00                                                         | Pulse Sequence         | s2pul               |
| Sweep Width (Hz)       | 6000.60                                                       | Solvent                | DMSO-d6             |
|                        |                                                               | Temperature (degree C) | AMBIENT TEMPERATURE |
|                        |                                                               | Number of Transients   | 16                  |
|                        |                                                               | Spectrum Offset (Hz)   | 2777.0400           |

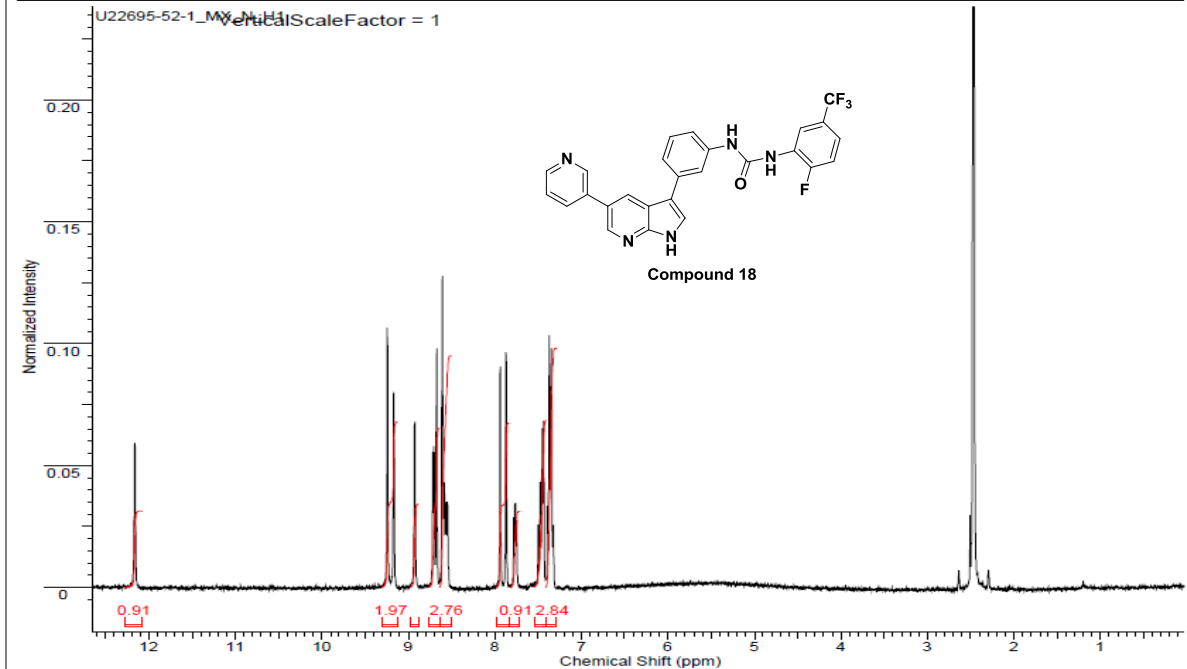

Compounds **24-35** were made according to the Schemes 4 below as described in Hirst G. C.; Arnold L. D.; Burchat A.; Wishart N.; Calderwood D.; Wada C. K.; Michaelides, M. R.; Ji Z.; Muckey M. *PCT Int. Appl.* **2003**, WO 2003080064.

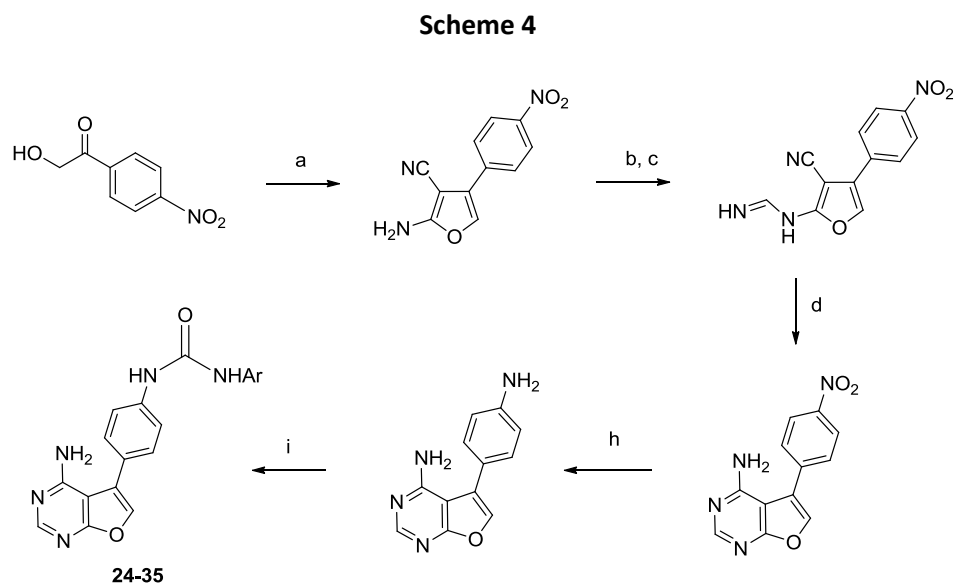

Reagents and conditions: (a) malononitrile, Et<sub>2</sub>NH, MeOH, rt, 23%; (b) HC(OEt)<sub>3</sub>, (NH<sub>4</sub>)<sub>2</sub>SO<sub>4</sub>, reflux; (c) NH<sub>3</sub>, EtOH, rt; 88% for 2 steps; (d) 1,2-dichlorobenzene, microwave 200°C, 41% (h) Fe, NH<sub>4</sub>Cl, EtOH-H<sub>2</sub>O, 80 °C, 70%; (i) ArNCO, CH<sub>2</sub>Cl<sub>2</sub>, rt, 42% for 3,5-bis(trifluoromethyl)phenyl isocyanate.

#### Preparation of 2-amino-4-(4-nitrophenyl)furan-3-carbonitrile

To a stirred mixture of 2-hydroxy-1-(4-nitrophenyl)ethanone (2 g, 11 mmol) and malononitrile (0.89 g, 12.1 mmol) in methanol (10 mL) was added diethylamine (0.34 g, 4.6 mmol) and the reaction stirred at room temperature for 1 hour. The reaction mixture was then poured into cold water (200 mL) and extracted with ethyl acetate (3 x 100 mL). The organic phases were dried over magnesium sulfate and evaporated under reduced pressure to give the crude product which was purified by chromatography on a silica gel column (eluting with petroleum ether/ ethyl acetate 1:1) to afford the product as a red solid (0.7 g, 23% yield).

#### Preparation of N-(3-cyano-4-(4-nitrophenyl)furan-2-yl)formimidamide

A mixture of 2-amino-4-(4-nitrophenyl)furan-3-carbonitrile (0.46 g, 2 mmol) and ammonium sulfate (0.29 g, 2.2 mmol) in triethylformate (9 mL) was heated to reflux for 4 h. The reaction mixture was cooled to -20°C and then treated with 2M ammonia in ethanol (20 mL) and the reaction was allowed to warm to room temperature and stirred overnight. The resulting precipitate was filtered off, washed with water and ethanol and dried to give the product as a light-yellow solid (0.45 g, 87% yield).

#### Preparation of 5-(4-nitrophenyl)furo[2,3-d]pyrimidin-4-amine

A suspension of N-(3-cyano-4-(4-nitrophenyl)furan-2-yl)formimidamide (0.4 g, 1.56 mmol) in 1,2-dichlorobenzene (5 mL) was microwaved at 200°C for 15 minutes. The reaction mixture was diluted with THF and concentrated. The resulting crude product was purified by chromatography on a silica gel column (eluting with dichloromethane/ methanol 95:5) to afford the product as a yellow solid (0.16 g, 41% yield).

#### Preparation of 5-(4-aminophenyl)furo[2,3-d]pyrimidin-4-amine

A mixture of 5-(4-nitrophenyl)furo[2,3-d]pyrimidin-4-amine (0.3 g, 1.17 mmol) and ammonium chloride (0.15 g, 2.8 mmol) in 2:1 ethanol/water (20 mL) was heated with stirring to 50°C, treated with iron powder (0.3 g, 5.4 mmol) and heated to 80°C for a further 2 hours. The reaction mixture was cooled to room temperature and filtered through celite and concentrated. The resulting crude product was purified by flash chromatography on a silica gel column (eluting with ethyl acetate / hexanes, 1:2) to afford the product as a brown solid (0.21 g, 70% yield).

### Preparation of 1-(4-(4-aminofuro[2,3-d]pyrimidin-5-yl)phenyl)-3-(3,5-bis(trifluoromethyl)phenyl)urea

A suspension of 5-(4-aminophenyl)furo[2,3-d]pyrimidin-4-amine (0.9 g, 0.4 mmol) in dichloromethane (3 mL) was treated with 3,5-bis(trifluoromethyl)phenyl isocyanate (0.1 g, 0.4 mmol), warmed to room temperature, and stirred overnight. The resulting precipitate was collected by vacuum filtration, washed with dichloromethane, and dried to provide the product (0.095 g, 0.19 mmol, 47 % yield) as gray solid.

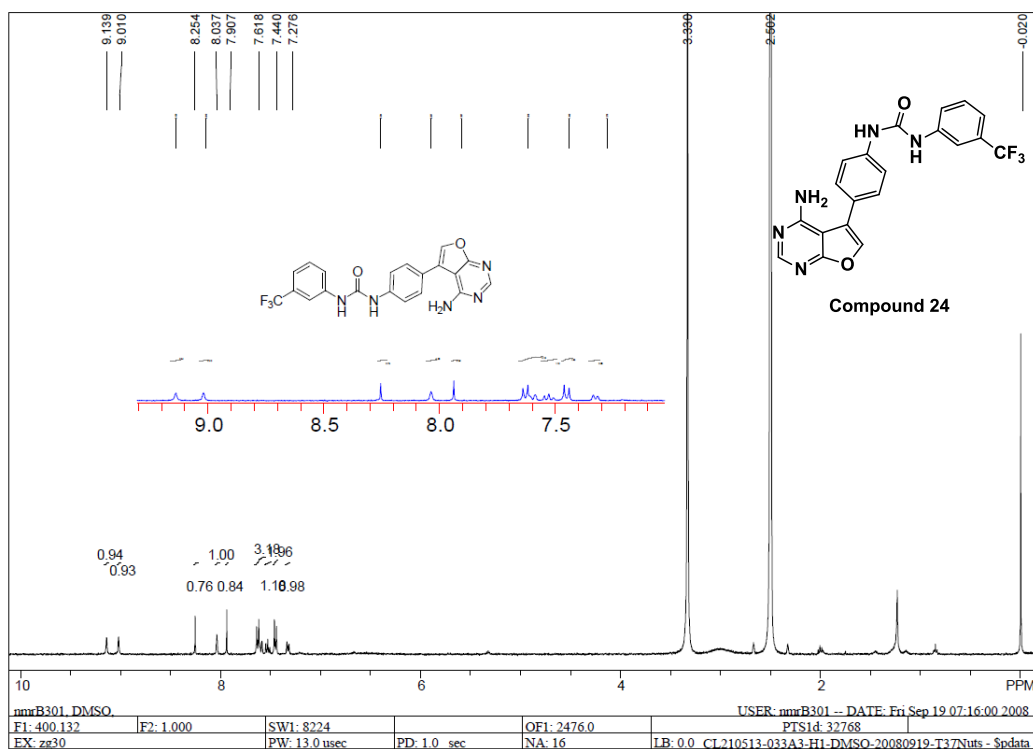

|                        |                                                                    |                        |                      |
|------------------------|--------------------------------------------------------------------|------------------------|----------------------|
| Acquisition Time (sec) | 3.9584                                                             | Comment                | PH20153 GSK2267063A  |
| Date                   | 06 Sep 2013 17:37:04                                               | Date Stamp             | 06 Sep 2013 17:37:04 |
| File Name              | \\uptsfshr01\sa200200355\2013\9-6-2013\CL210513-055A3\20\data\1\1r |                        |                      |
| Frequency (MHz)        | 400.15                                                             | Nucleus                | 1H                   |
| Origin                 | up2w                                                               | Original Points Count  | 32768                |
| Points Count           | 32768                                                              | Pulse Sequence         | zg30                 |
| SW(cyclical) (Hz)      | 8278.15                                                            | Solvent                | DMSO-d6              |
| Sweep Width (Hz)       | 8277.89                                                            | Temperature (degree C) | 25.900               |
|                        |                                                                    | Number of Transients   | 128                  |
|                        |                                                                    | Owner                  | nmrsu                |
|                        |                                                                    | Receiver Gain          | 128.00               |
|                        |                                                                    | Spectrum Offset (Hz)   | 2471.0894            |

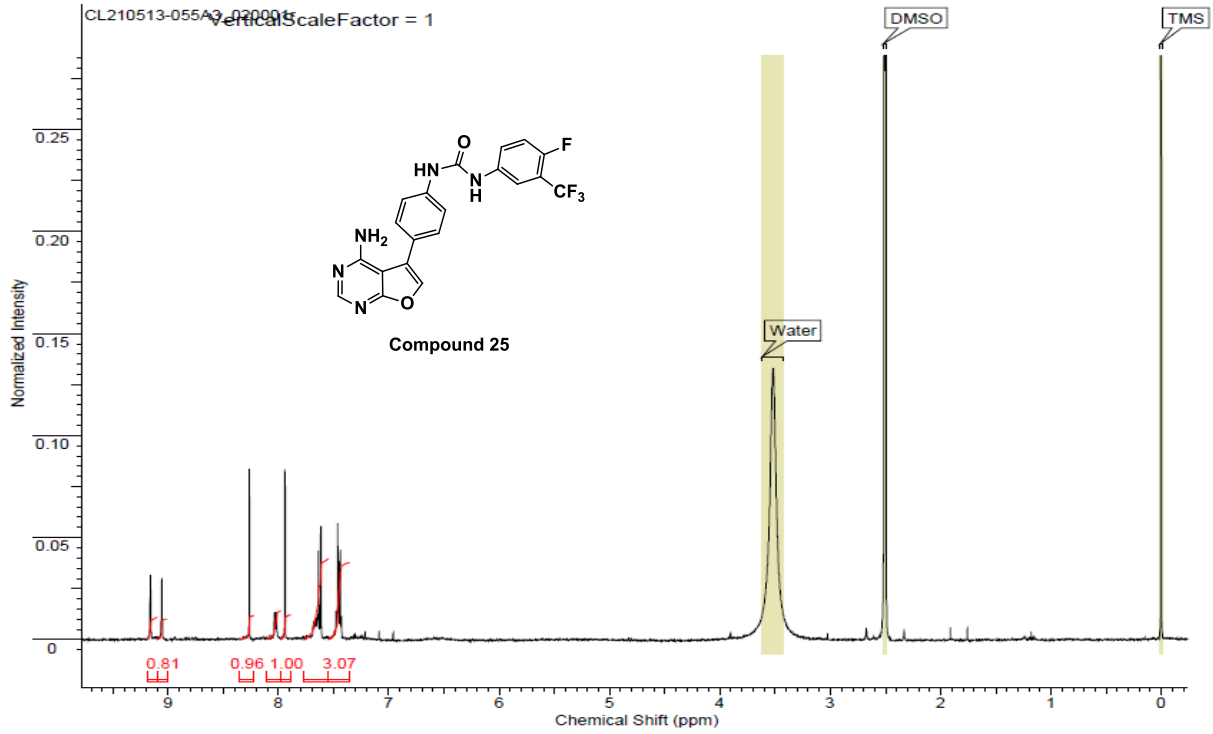

|                        |                                                                    |                        |                       |
|------------------------|--------------------------------------------------------------------|------------------------|-----------------------|
| Acquisition Time (sec) | 3.9584                                                             | Comment                | PH20153 SB-738017-AAA |
| Date                   | 06 Sep 2013 13:23:12                                               | Date Stamp             | 06 Sep 2013 13:23:12  |
| File Name              | \\uptsfshr01\sa200200355\2013\9-6-2013\CL210513-034A3\10\data\1\1r |                        |                       |
| Frequency (MHz)        | 400.15                                                             | Nucleus                | 1H                    |
| Origin                 | up2w                                                               | Original Points Count  | 32768                 |
| Points Count           | 32768                                                              | Pulse Sequence         | zg30                  |
| SW(cyclical) (Hz)      | 8278.15                                                            | Solvent                | DMSO-d6               |
| Sweep Width (Hz)       | 8277.89                                                            | Temperature (degree C) | 26.200                |
|                        |                                                                    | Number of Transients   | 128                   |
|                        |                                                                    | Owner                  | nmrsu                 |
|                        |                                                                    | Receiver Gain          | 161.30                |
|                        |                                                                    | Spectrum Offset (Hz)   | 2471.0894             |

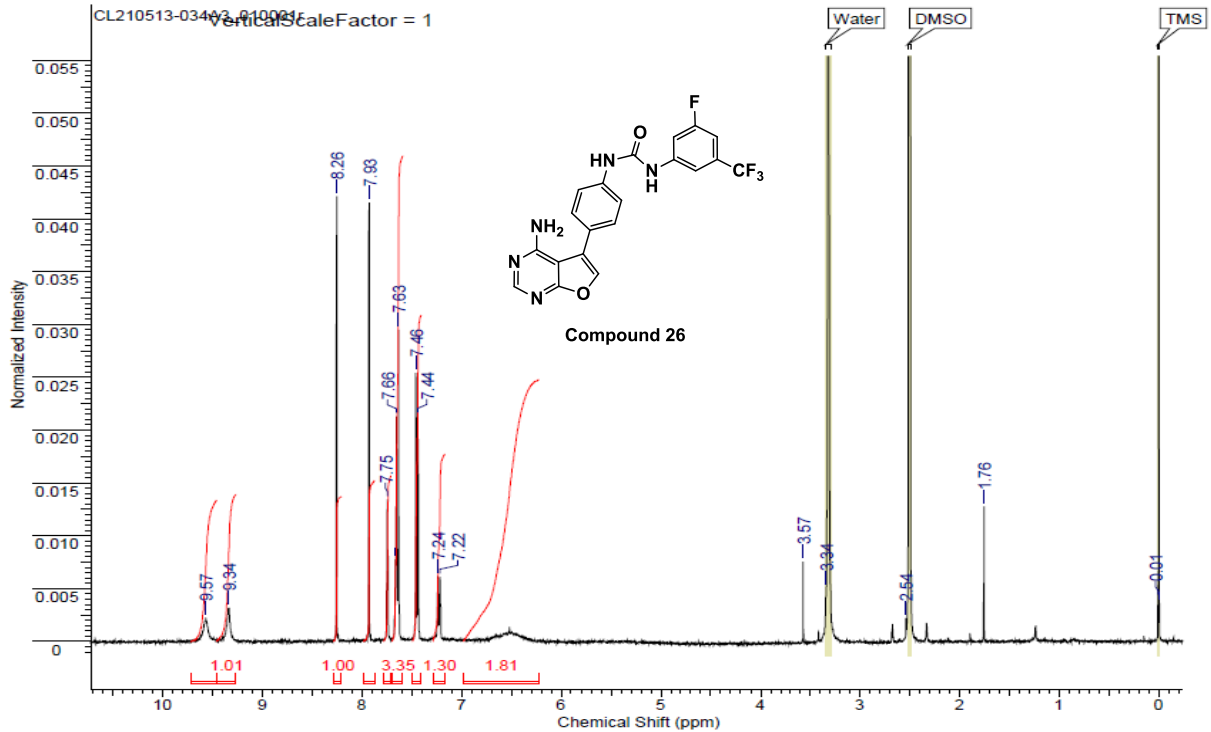

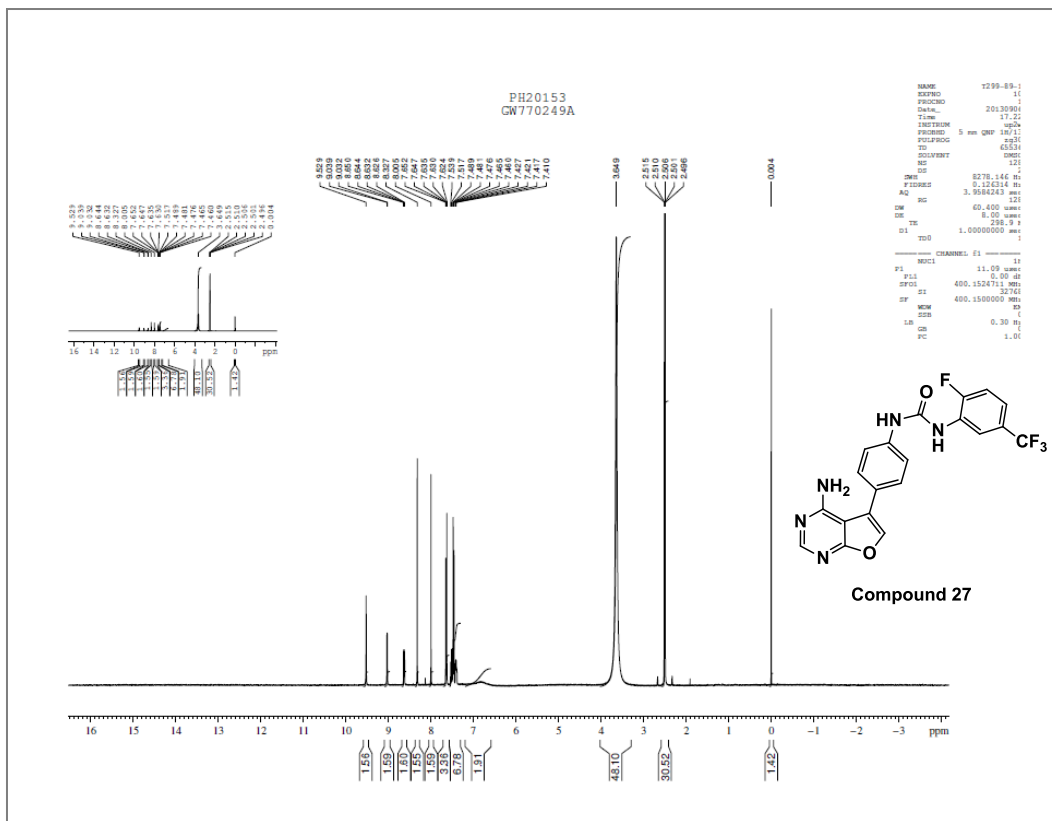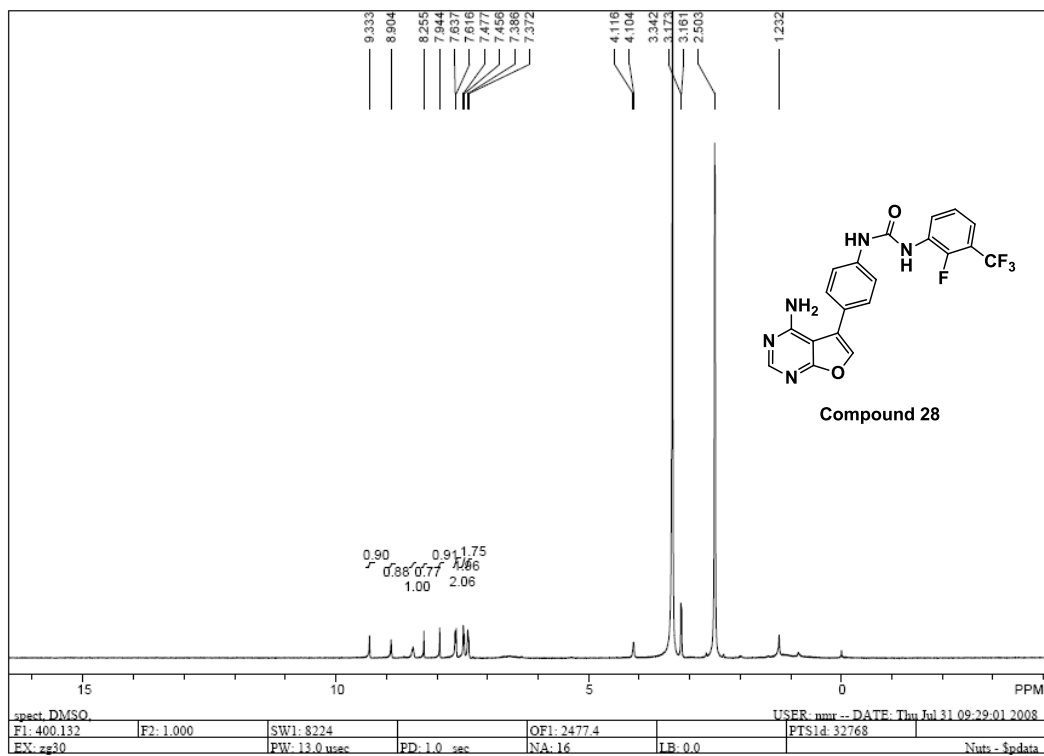



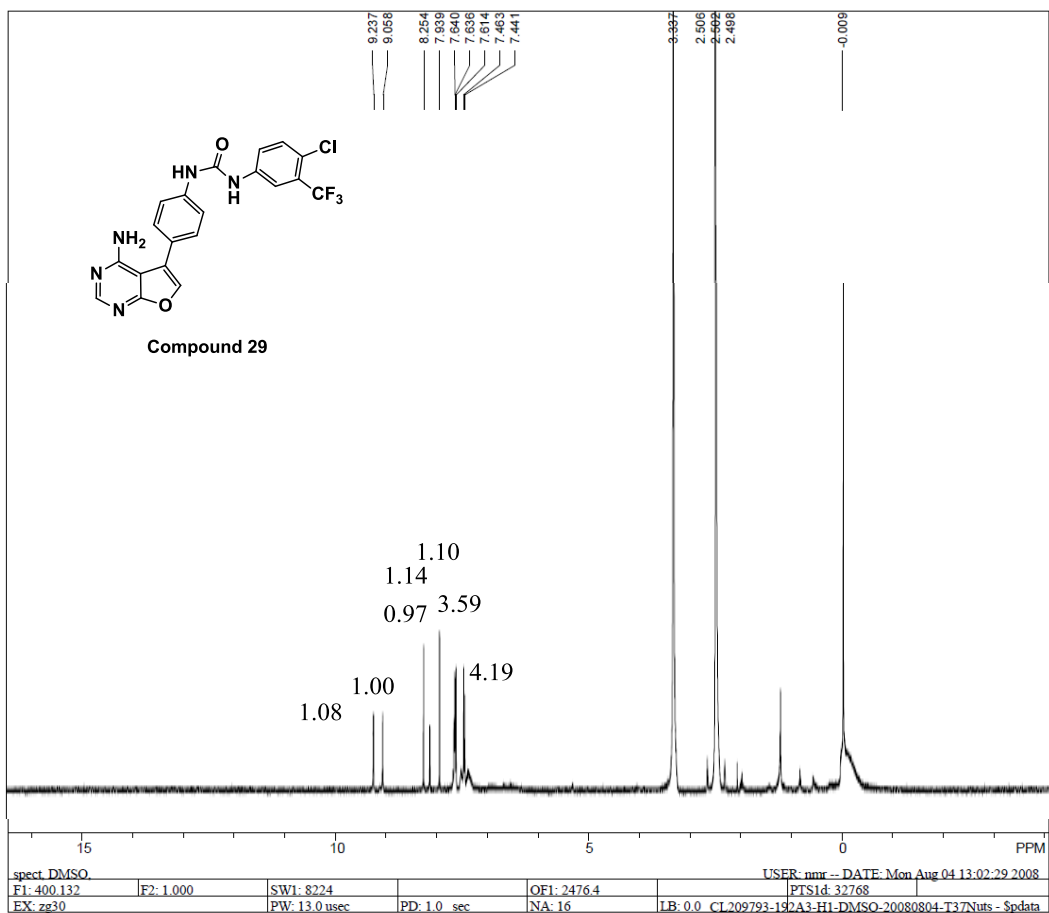

| Acquisition Time (sec) | 3.9584                                                              | Comment                | PH20153 GW796883X    |
|------------------------|---------------------------------------------------------------------|------------------------|----------------------|
| Date                   | 10 Sep 2013 11:06:40                                                | Date Stamp             | 10 Sep 2013 11:06:40 |
| File Name              | \u\ptsfshr01\sa200200355\2013\9-10-2013\CL209793-194A3110\data\1\1r |                        |                      |
| Frequency (MHz)        | 400.15                                                              | Nucleus                | <sup>1</sup> H       |
| Origin                 | up2w                                                                | Original Points Count  | 32768                |
| Points Count           | 32768                                                               | Pulse Sequence         | zg30                 |
| SW(cyclical) (Hz)      | 8278.15                                                             | Solvent                | DMSO-d6              |
| Sweep Width (Hz)       | 8277.89                                                             | Temperature (degree C) | 26.100               |
|                        |                                                                     | Number of Transients   | 128                  |
|                        |                                                                     | Owner                  | nmrsu                |
|                        |                                                                     | Receiver Gain          | 128.00               |
|                        |                                                                     | Spectrum Offset (Hz)   | 2471.0894            |

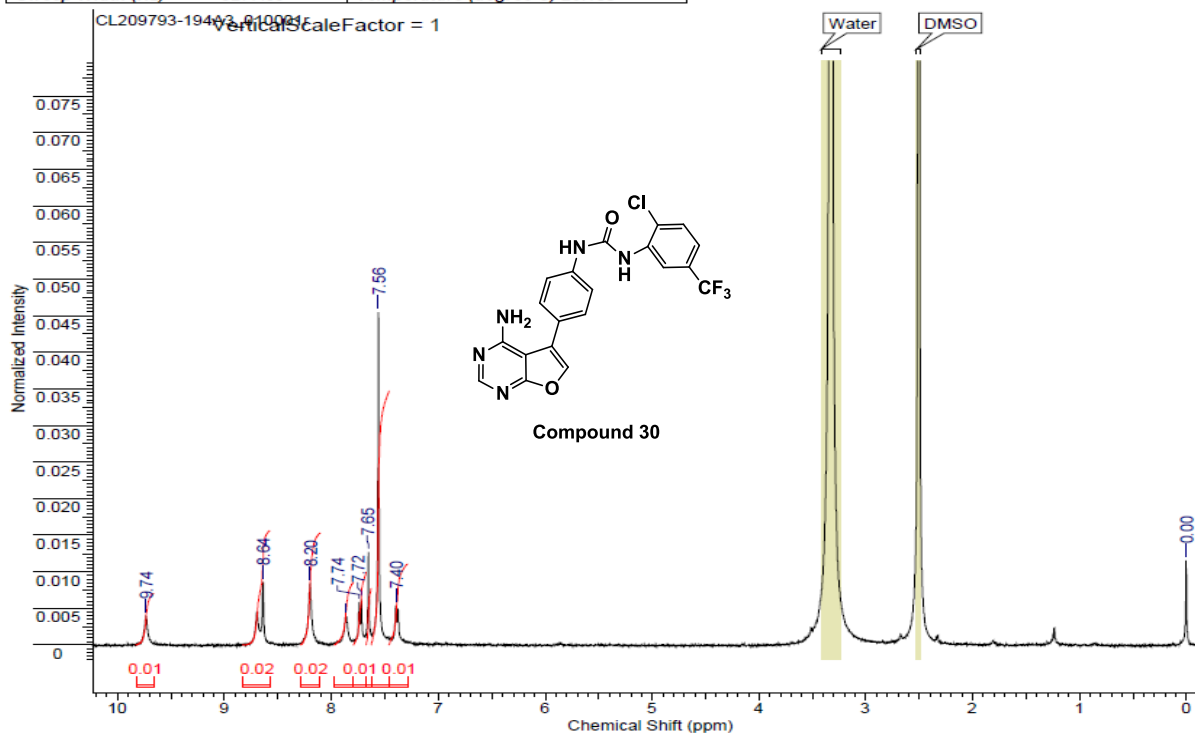

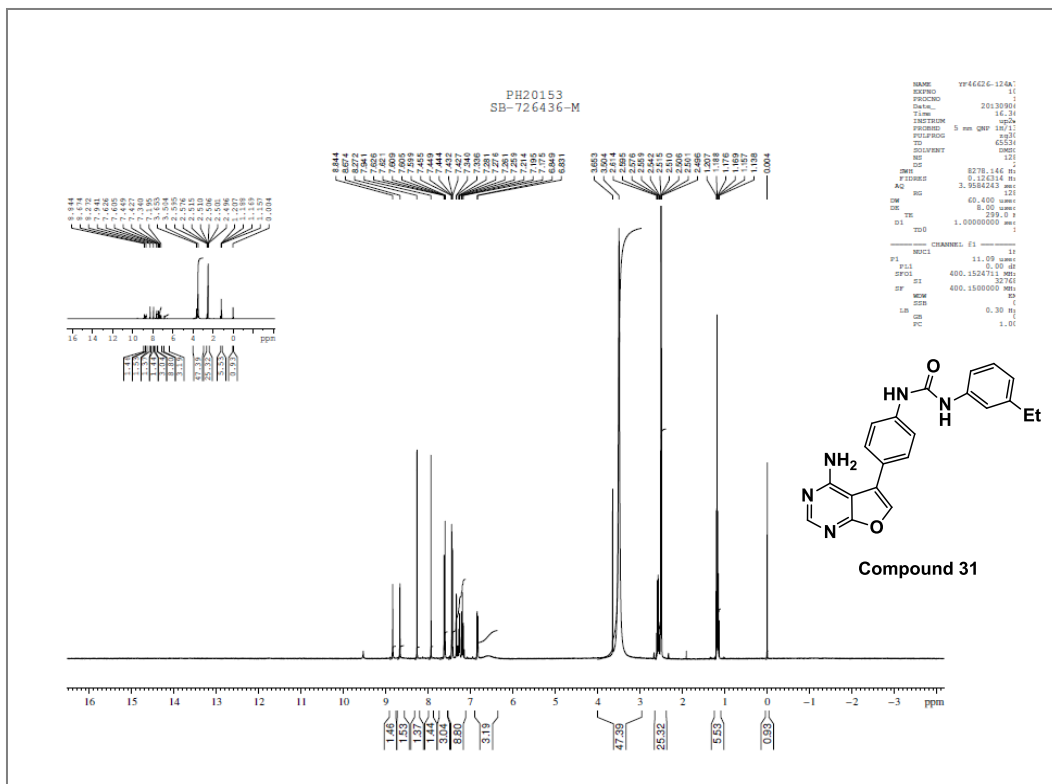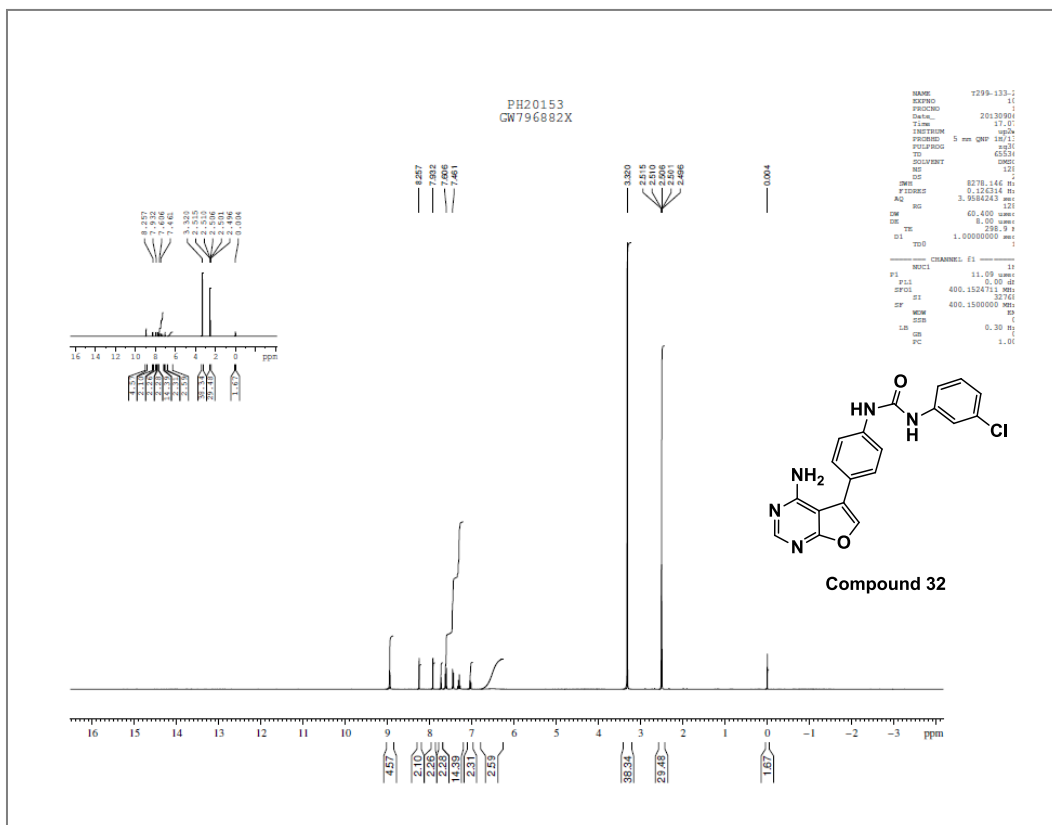

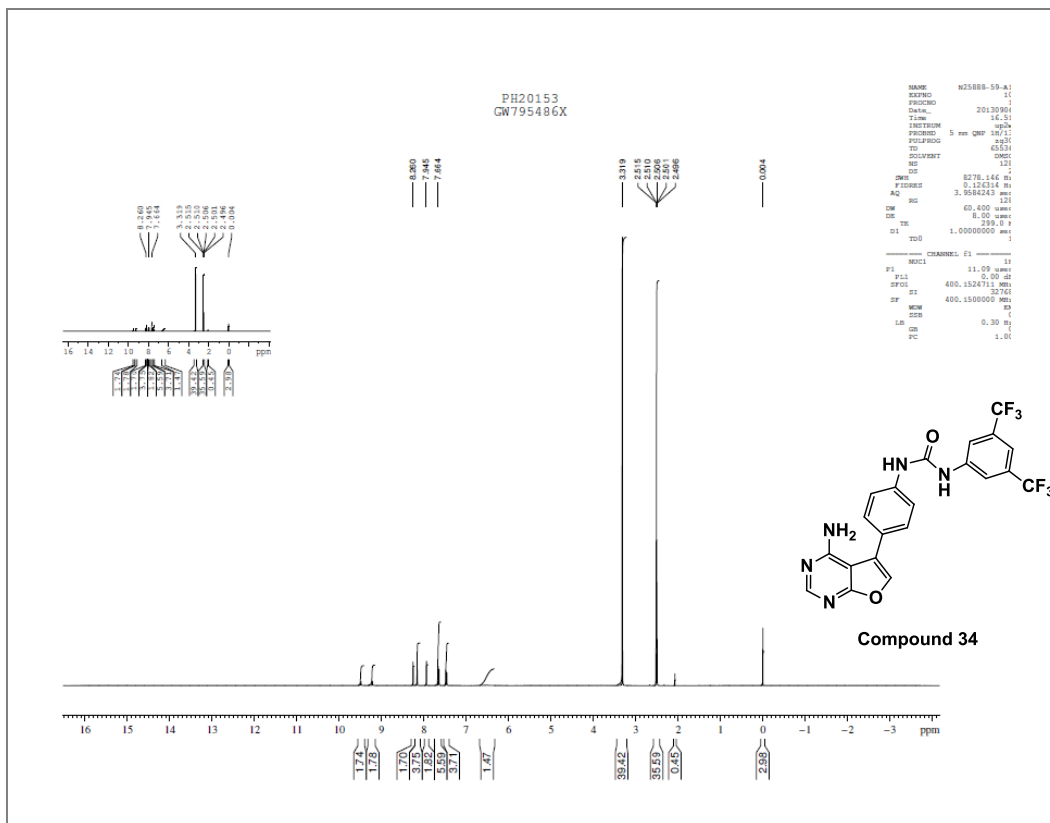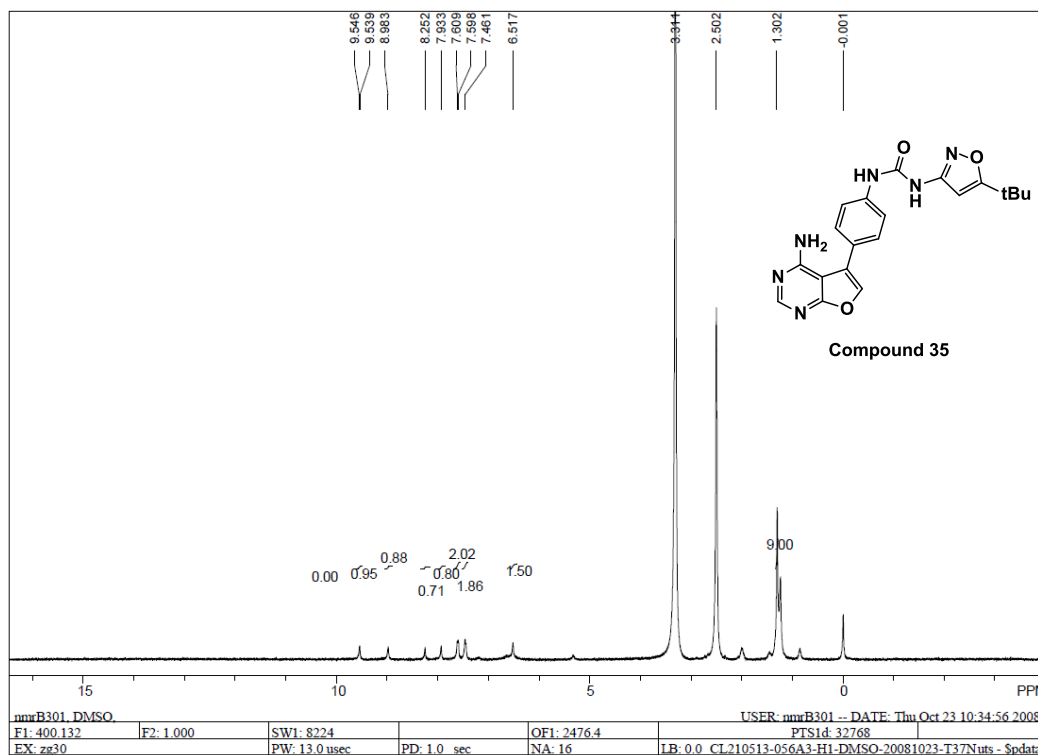

Biological *in vitro* biochemical assay

A fluorescent polarization based binding assay was developed to quantitate interaction of novel test compounds at the ATP binding pocket of RIP1, by competition with a fluorescently labeled ATP competitive ligand. GST-RipK1(1-375) was purified from a Baculovirus expression system and was used at a final assay concentration of 10nM. A fluorescent labeled ligand (14-(2-([3-([4-(cyanomethyl)phenyl)amino]-6-[(5-cyclopropyl-1H-pyrazol-3-yl)amino]-4-pyrimidinyl)amino)propyl)amino]-2-oxoethyl)-16,16,18,18-tetramethyl-6,7,7a,8a,9,10,16,18-octahydrobenzo[2'',3'']indolizino[8'',7'':5',6']pyrano[3',2':3,4]pyrido[1,2-a]indol-5-ium-2-sulfonate was used at a final assay concentration of 5nM. Both the enzyme and ligand were prepared in solutions in 50mM HEPES pH7.5, 10mM NaCl, 50mM MgCl<sub>2</sub>, 0.5mM DTT, and 0.02% CHAPS. Test compounds were prepared in neat DMSO and 100nL was dispensed to individual wells of a multiwell plate. Next, 5ul GST-RipK1(1-375) was added to the test compounds at twice the final assay concentration, and incubated at room temperature for 10 minutes. Following the incubation, 5ul of the fluorescent labeled ligand solution, was added to each reaction, at twice the final assay concentration, and incubated at room temperature for at least 15 minutes. Finally, samples were read on an instrument capable of measuring fluorescent polarization. Test compound inhibition was expressed as percent (%) inhibition of internal assay controls. For concentration response experiments, normalized data were fit and pIC<sub>50</sub>s determined using conventional techniques. The pIC<sub>50</sub>s are averaged to determine a mean value, for a minimum of 2 experiments.

Compound potency against RIP1 kinase activity was determined using an ADP-Glo luminescence assay, which measures the conversion of ATP to ADP. Test compounds were prepared in neat DMSO and 100nL was dispensed to each well of a multiwell plate. The primary reaction consist of 10nM GST-RIPK1 (1-375) and 50uM ATP in 50mM HEPES pH 7.5, 50mM NaCl, 30mM MgCl<sub>2</sub>, 1mM DTT, 0.5mg/mL BSA, and 0.02% CHAPS. 5uL of enzyme and 5uL of ATP were added to the plate at twice the final assay concentration and incubated at room temperature for 4 hours. Following this reaction, 5uL of Promega's ADP-Glo reagent was added to each well and incubated for 1 hour at room temperature. This stops the kinase reaction and depletes any remaining ATP. 5uL of ADP-Glo detection reagent is then added to each well and incubated at room temperature for at least 30minutes. The detection reagent converts ADP to ATP and introduces luciferase and luciferin to detect ATP. The luminescence is then measured on a plate reader. Test compound inhibition was expressed as percent inhibition of internal assay controls. For concentration response curves, normalized data is fit and pIC<sub>50</sub>s determined using conventional techniques. The pIC<sub>50</sub>s are averaged to determine a mean value, for a minimum of 2 experiments.

### **GST-RipK1 Preparation**

His.GST.TEV.RIPK1 1-375

The RIPK1 gene [receptor (TNFRSF)-interacting serine-threonine kinase 1] was cloned from human adrenal gland cDNA. Primers were designed from the reference sequence NM\_003804.3 with an added CACC Kozak directional tag for cloning into pENTR/TEV/D-TOPO. Gateway<sup>®</sup> LR cloning was used to site-specifically recombine RIPK1 downstream to an N-terminal HisGST contained within the destination vector pDEST8-His.GST according to the protocol described by Invitrogen. A stop codon was inserted after amino acid 375 using Quikchange Stratagene mutagenesis kit according to manufacturer's protocol and resulted in pDEST8.His.GST.TEV.human RIPK1 1-375. His.GST.Tev.human RIPK1 1-375 baculovirus

was generated using the bac to bac system (Invitrogen) according to manufacturer's specifications. Transfection of *Spodoptera frugiperda*(Sf9) insect cells was performed using Fugene 6 (Roche), according to the manufacturer's protocol. His.GST.TEV.human RIPK1 1-375 baculovirus infected insect cells (BIICs) were prepared during the baculovirus generation according to David Wasilko and S Edward Lee, TIPS: Titerless Infected Cells Preservation and Scale up, BioProcessing Journal Fall 2006 p29-32. 20L Sf9 cells were grown in serum free Hyclone, SFX media (HyClone Laboratories, 925 West 1800 South Logan, Utah 84321) at 27°C in wave bags seeded at a density of  $8 \times 10^6$  cell/ml with a rock rate of 25rpm, airflow of .18 to .22. in wave reactor (WAVE Bioreactor, System 20/50EH). Cells were grown ON at 27C. His.GST.TEV.human RIPK1 1-375 baculovirus infected insect cells (BIICs) were used to infect Sf9s at a cell density of 1.7 to 2.4  $\times 10^6$ . 2ml of BIIC ( $1 \times 10^7$  cells/mL) were added to 20L cells. Rock rate is increased to 25rpm at infection. Harvest 72 hrs post infection using the Viafuge. Weigh pellets, seal wave bags and freeze at -80.

A 50g cell pellet was re-suspended in 250ml lysis buffer (50mM Tris pH 7.5, 250mM NaCl, 1mM DTT and Complete Protease Inhibitor tablets (1/50ml, from Roche Diagnostics). The cells were lysed by sonication on ice, 3x30" at power level 4 using the large probe on a Branson Sonicator. The suspension was then clarified by centrifugation at 15,000g for 30 minutes, at 4°C. The lysate was decanted from the insoluble pellet and batch bound to 10ml of Glutathione Agarose (Pierce) for 2h at 4C with gentle end over end rotation. The beads were then packed into a column and washed to baseline with lysis buffer (no protease inhibitors) and then eluted with 20mM reduced glutathione in 50mM Tris, pH8.

Fractions identified by SDS-PAGE as containing protein of interest were pooled (10ml total volume), concentrated to about 5ml and loaded onto a 300ml SDX200 SEC column (GE Healthcare) which had been equilibrated in 50mM Tris, pH7.5, 150mM NaCl, 1mM DTT and 10% Glycerol. The Rip1 protein eluted as a dimer off the SEC column.

The protein concentration was determined by Bradford assay using BSA as a standard. The yield was 12.5mg at 0.63mg/ml. The purity was >95% as determined by scanning a Coomassie stained SDS-PAGE gel.

LCMS analysis showed that the major species had lost the N-terminal methionine, was acetylated and had one phosphorylated site. The protein was aliquoted and frozen at -80C for use as needed.

### **Biological *in vitro* cell assay**

The efficacy of RIP1 inhibitors were tested in mice *in vitro* using a human monocytic leukemia U937 cells in a necroptosis assay (He S.; Wang L.; Miao L.; Wang T.; Du F.; Zhao L.; Wang X. Receptor interacting protein kinase-3 determines cellular necrotic response to TNF-alpha. *Cell*, **2009**, 137, 1100). Cells were maintained in RPMI supplemented with 10% fetal bovine serum 100U/ml penicillin, 100ug/ml streptomycin. For the assay, cells were suspended at  $5 \times 10^5$  cells/ml in phenol red free RPMI supplemented with 1% fetal bovine serum, 100U/ml penicillin, 100ug/ml streptomycin. Thirty-five (35) ul of the cell suspension was aliquotted into a white, half area assay plate. Five (5) ul each of QVD (final concentration 50uM) or compound was added to the cells and incubated at 37°C for 30 min to 1h. Following the incubation, 5ul TNF $\alpha$  (final concentration 100ng/ml) was added to the cells and the samples were incubated overnight. The next day, cellular levels of ATP was determined using the Cell Titer-Glo Luminescent Cell Viability kit (available from Promega Corporation, Madison, Wisconsin, USA). All data are shown as means  $\pm$  standard deviation of the mean.

## FlagRip1(1-324) Preparation

**Cloning and Expression.** The RIPK1 gene [receptor (TNFRSF)-interacting serine-threonine kinase 1] was cloned from human adrenal gland cDNA. Primers were designed from the reference sequence NM\_003804.3 with an added CACC Kozak and FLAG tag for cloning into pFASTBac. Infusion was used to site-specifically (BamHI/XhoI) recombine RIPK1 1-324 to a pFASTBac vector according to the protocol described by Clontech resulting in pFASTBacFlag humanRIPK1 1-324. Baculovirus was generated using the bac to bac system (Invitrogen) according to manufacturer's specifications. Transfection of *Spodoptera frugiperda*(Sf9) insect cells was performed using Eugene 6 (Roche), according to the manufacturer's protocol. pFASTBacFlag.human RIPK1 1-324 baculovirus infected insect cells (BIICs) were prepared during the baculovirus generation according to David Wasilko and S Edward Lee, TIPS: Titerless Infected Cells Preservation and Scale up, BioProcessing Journal Fall 2006 p29-32. 20L Sf9 cells were grown in serum free Hyclone, SFX media (HyClone Laboratories, 925 West 1800 South Logan, Utah 84321) at 27°C in wave bags seeded at a density of  $8 \times 10^6$  cell/ml with a rock rate of 25rpm, airflow of .18 to .22. in wave reactor (WAVE Bioreactor, System 20/50EH). Cells were grown ON at 27C. pFASTBacFlag.human RIPK1 1-324 baculovirus infected insect cells (BIICs) were used to infect Sf9s at a cell density of  $1.7$  to  $2.4 \times 10^6$ . 2ml of BIIC ( $1 \times 10^7$  cells/mL) were added to 20L cells. Rock rate is increased to 25rpm at infection. Harvest 72 hrs post infection using the Viafuge. Weigh pellets, seal wave bags and freeze at -80.

**Purification.** 60 grams of cells were lysed in 300 mL of lysis buffer ( 50 mM Tris pH = 7.5, 150 mM NaCl, 10 % glycerol) with a Dounce homogenizer, 10 strokes with a B pestle per 100 mL of lysate. The lysate was spun at 100,000xg for 90 minutes in a 30.25 rotor. The supernatant was batch bound to 10 mL of FLAG resin at 4C for 2 hours. The beads were spun and washed extensively and eluted in a drip column with 200 ug / mL Flag peptide in lysis buffer. Fractions Containing the protein were pooled, concentrated and run on a sizing column (SDX200) equilibrated with 25 mM Tris pH=7.5, 150 mM NaCl, 1mM DTT and 5 % glycerol. Fractions with Rip1 protein were pooled and used for incubating compound and co-crystallization.

**Crystallization.** Compound **8** was incubated over night with protein concentration of 0.5 mgs / ml and concentrated to 16mgs /mL. Concentrated complex was screened with Hampton Index Screen with sitting drop vapor diffusion with 200 nL protein plus 200 nL reservoir solution. Crystals grew from condition, E8 (0.2 M Potassium Chloride, 0.05 M HEPES pH=7.5, 35 % v/v Pentaerythritol Propoxylate (5/4 PO/OH). After optimization, single crystals suitable for x-ray data collection grew from 0.2 M Potassium Chloride, 0.05 M Bis Tris pH 6.5, 40 % v/v Pentaerythritol Propoxylate (5/4 PO/OH). Crystals were mounted in loops and plunged into liquid nitrogen for data collection.

**Structure Determination and refinement.** X-ray diffraction data was collected from a single crystal at 100°K at a wavelength of 0.97872 Å using a Rayonix225 detector on LS-CAT beamline 21IDF located at the Advanced Photon Source (Argonne, IL). HKL2000<sup>1</sup> was used to integrate and scale the diffraction data. The Rip1 structure was solved using data to 3.0Å with the phaser.brunett<sup>2</sup> program. A number of models were tried in molecular replacement, with the best results obtained using a model based on the LIMK1 structure (PDB code 3S95) from residues 337-612 in which several significant stretches of residues had been deleted (346:351, 371:375, 405-408, 428-432, 485:514, 522:526, 546:569). Two molecules of RIP1 were identified in the asymmetric unit of the R32 cell. Molecular replacement phases were further improved by several rounds of Autobuster<sup>3</sup> refinement at the full resolution of the data 2.6

Å. The RIP1 structure was built using the Coot<sup>4</sup> molecular graphics program. Initial model refinement was carried out using phenix.refine<sup>5</sup> alternating with model rebuilding in coot. Final refinement steps were carried out using Refmac5.6<sup>6</sup>. The crystallographic data and refinement statistics are summarized in Table S1.

1. Otwinowski, Z.; Minor, W. Processing of X-ray diffraction data. *Methods enzymol* 1997, 276, 307-326.
2. McCoy, A. J.; Grosse-Kunstleve, R. W.; Adams, P. D.; Winn, M. D.; Storoni, L. C.; Read, R. J. Phaser crystallographic software. *Journal of applied crystallography* 2007, 40, 658-674.
3. Bricogne, G.; Blanc E.; Brandl M.; Flensburg C.; Keller P.; Paciorek W.; Roversi P.; Sharff A.; Smart O.S.; Vonrhein C.; Womack, T. O. BUSTER. [2.11.5]. 2013. Cambridge, United Kingdom, Global Phasing Ltd. Ref Type: Computer Program
4. Emsley, P.; Cowtan, K. Coot: model-building tools for molecular graphics. *Acta Crystallographica Section D: Biological Crystallography* 2004, 60, 2126-2132.
5. Adams, P. D.; Afonine, P. V.; Bunkoczi, G.; Chen, V. B.; Davis, I. W.; Echols, N.; Headd, J. J.; Hung, L. W.; Kapral, G. J.; Grosse-Kunstleve, R. W.; McCoy, A. J.; Moriarty, N. W.; Oeffner, R.; Read, R. J.; Richardson, D. C.; Richardson, J. S.; Terwilliger, T. C.; Zwart, P. H. PHENIX: a comprehensive Python-based system for macromolecular structure solution. *Acta Crystallographica Section D: Biological Crystallography* 2010, 66, 213-221.
6. Murshudov, G.N.; Vagin, A.A; Dodson, E.J. Refinement of Macromolecular Structures by the Maximum-Likelihood Method. *Acta Crystallographica Section D: Biological Crystallography* 1997, 53, 240-255.

**Table S1. Data collection and refinement statistics.**

**X-Ray Data**

|                           |                                      |
|---------------------------|--------------------------------------|
| Source                    | AdvancedPhoton Source, LS-CAT; 21IDf |
| Wavelength (Å)            | 0.97872                              |
| Resolution range (Å)      | 74.62 - 2.57 (2.71 - 2.57)           |
| Space group               | R 3 2 :H                             |
| Unit cell (Å and degrees) | 149.25 149.25 187.66<br>90 90 120    |
| Total reflections         | 90008 (13076)                        |
| Unique reflections        | 25546 (3723)                         |
| Multiplicity              | 3.5 (3.5)                            |
| Completeness (%)          | 99.4 (99.9)                          |

|                 |               |
|-----------------|---------------|
| Mean I/sigma(I) | 16.1 (3.1)    |
| Wilson B-factor | 56.5          |
| R-merge         | 0.065 (0.485) |

### Refinement Statistics

|                           |                |
|---------------------------|----------------|
| R-work                    | 0.181 (0.2091) |
| R-free                    | 0.242 (0.312)  |
| Number of atoms           | 4629           |
| Macromolecules            | 4390           |
| Ligands                   | 61             |
| Water                     | 221            |
| Protein residues          | 561            |
| RMS(bonds)                | 0.009          |
| RMS(angles)               | 1.280          |
| Ramachandran favored (%)  | 98             |
| Ramachandran outliers (%) | 0              |
| Clashscore                | 4.6            |
| Average B-factor          | 60.50          |
| Macromolecules            | 60.80          |
| Ligands                   | 45.30          |
| Solvent                   | 58.70          |

Statistics for the highest-resolution shell are shown in parentheses.

$$R_{\text{merge}} = \frac{\sum (|I_h| - \langle I_h \rangle)}{\sum \langle I_h \rangle},$$

$R_{\text{-work}} = \frac{\sum |F_p - F_{\text{calc}}|}{\sum F_p}$ , where  $F_p$  and  $F_{\text{calc}}$  are observed and calculated structure factors.  $R_{\text{-free}}$  is calculated from a randomly chosen 5 % of reflections that are never used in refinement

### Biological *in vivo* assay



The efficacy of RIP1 inhibitors can be tested in mice *in vivo* using a TNF-driven systemic inflammatory response syndrome model (Duprez L.; Takahashi N.; Van Hauwermeiren F.; Vandendriessche B.; Goossens V.; Vanden Berghe T.; Declercq W.; Libert C.; Cauwels A.; Vandenabeele, P. RIP Kinase-Dependent Necrosis Drives Lethal Systemic Inflammatory Response Syndrome. *Immunity* **2011**, 35, 908). A total of 7 mice per dose group were orally pre-dosed with vehicle or compound **27** at doses of 0.2, 2.0 and 20 mg/kg 15 minutes before i.v. administration of mouse TNF (30 mg/mouse). Temperature loss in the mice was measured by rectal probe. The study was terminated after ~7 hours when the control group lost 7 degrees. All data are shown as means  $\pm$  standard error of the mean.

All studies involving the use of animals were conducted after review by the GlaxoSmithKline (GSK) Institutional Animal Care and Use Committee and in accordance with the GSK Policy on the Care, Welfare and Treatment of Laboratory Animals.

### Kinome selectivity

Compounds **8**, **27** and **17** were tested against 300 kinases using a P33 radiolabeled assay at Reaction Corp Biology.<sup>22</sup> Compounds were tested in single dose duplicate mode at 1  $\mu$ M. Reactions were carried out at 10  $\mu$ M ATP. Data is reported as % enzyme activity (relative to DMSO controls).

| Kinase             | Compound 8 |        | Compound 27 |        | Compound 17 |        |
|--------------------|------------|--------|-------------|--------|-------------|--------|
|                    | Data 1     | Data 2 | Data 1      | Data 2 | Data 1      | Data 2 |
| <b>ABL1</b>        | 64.25      | 65.37  | 90.02       | 87.25  | 92.63       | 99.96  |
| <b>ABL2/ARG</b>    | 89.80      | 89.65  | 87.56       | 85.99  | 93.20       | 94.11  |
| <b>ACK1</b>        | 87.44      | 91.93  | 90.46       | 98.00  | 91.39       | 94.92  |
| <b>AKT1</b>        | 102.91     | 102.19 | 94.13       | 93.16  | 83.67       | 92.32  |
| <b>AKT2</b>        | 93.36      | 97.22  | 85.31       | 88.44  | 88.42       | 83.94  |
| <b>AKT3</b>        | 91.26      | 97.90  | 77.94       | 73.61  | 80.86       | 74.78  |
| <b>ALK</b>         | 97.38      | 103.55 | 83.32       | 84.71  | 100.88      | 100.68 |
| <b>ALK1/ACVRL1</b> | 88.82      | 95.04  | 91.14       | 91.06  | 110.51      | 120.18 |
| <b>ALK2/ACVR1</b>  | 108.94     | 105.73 | 103.00      | 98.22  | 100.25      | 99.85  |
| <b>ALK4/ACVR1B</b> | 119.66     | 112.03 | 103.26      | 101.43 | 97.85       | 104.49 |
| <b>ALK5/TGFBR1</b> | 97.32      | 100.00 | 96.58       | 94.40  | 97.42       | 95.46  |
| <b>ARAF</b>        | 58.27      | 58.58  | 99.61       | 101.72 | 102.09      | 101.85 |
| <b>ARK5/NUAK1</b>  | 117.43     | 106.45 | 112.34      | 99.31  | 84.90       | 89.58  |
| <b>ASK1/MAP3K5</b> | 105.65     | 106.89 | 103.98      | 100.97 | 97.59       | 99.61  |
| <b>Aurora A</b>    | 77.01      | 75.91  | 67.13       | 63.48  | 80.84       | 64.99  |
| <b>Aurora B</b>    | 8.02       | 9.23   | 29.48       | 26.80  | 89.78       | 83.07  |
| <b>Aurora C</b>    | 64.51      | 65.17  | 75.16       | 80.56  | 83.59       | 80.53  |
| <b>AXL</b>         | 35.58      | 36.59  | 84.78       | 83.71  | 102.16      | 98.10  |
| <b>BLK</b>         | 101.93     | 97.45  | 79.74       | 92.72  | 102.12      | 113.58 |
| <b>BMX/ETK</b>     | 109.85     | 108.93 | 72.56       | 70.52  | 105.90      | 109.53 |
| <b>BRAF</b>        | 60.91      | 62.67  | 97.08       | 88.27  | 94.34       | 94.17  |
| <b>BRK</b>         | 63.60      | 62.24  | 106.82      | 97.72  | 103.02      | 91.47  |
| <b>BRSK1</b>       | 106.45     | 109.35 | 94.34       | 78.06  | 84.23       | 98.15  |
| <b>BRSK2</b>       | 93.10      | 104.88 | 97.62       | 95.74  | 94.23       | 95.43  |
| <b>BTK</b>         | 111.62     | 107.87 | 96.64       | 95.60  | 98.68       | 100.82 |
| <b>c-Kit</b>       | 9.61       | 7.35   | 33.72       | 32.90  | 97.19       | 99.29  |
| <b>c-MER</b>       | 62.64      | 65.32  | 76.15       | 76.31  | 98.55       | 88.28  |
| <b>c-MET</b>       | 34.28      | 28.67  | 96.19       | 82.00  | 89.48       | 99.82  |

|                       |        |        |  |        |        |  |        |        |
|-----------------------|--------|--------|--|--------|--------|--|--------|--------|
| <b>c-Src</b>          | 84.63  | 95.99  |  | 100.24 | 94.57  |  | 95.58  | 94.21  |
| <b>CAMK1a</b>         | 107.73 | 107.15 |  | 102.20 | 102.91 |  | 106.02 | 111.41 |
| <b>CAMK1b</b>         | 100.91 | 99.26  |  | 93.51  | 106.52 |  | 94.23  | 103.07 |
| <b>CAMK1d</b>         | 111.53 | 113.25 |  | 114.70 | 113.65 |  | 117.04 | 117.85 |
| <b>CAMK1g</b>         | 89.02  | 88.48  |  | 85.87  | 81.90  |  | 91.82  | 92.89  |
| <b>CAMK2a</b>         | 111.23 | 111.05 |  | 95.97  | 105.40 |  | 95.14  | 123.57 |
| <b>CAMK2b</b>         | 100.95 | 103.58 |  | 87.05  | 88.15  |  | 96.58  | 86.67  |
| <b>CAMK2d</b>         | 109.32 | 113.42 |  | 118.04 | 117.02 |  | 75.51  | 83.43  |
| <b>CAMK2g</b>         | 111.33 | 113.30 |  | 113.86 | 122.03 |  | 109.09 | 99.88  |
| <b>CAMK4</b>          | 100.49 | 99.63  |  | 93.55  | 94.29  |  | 100.22 | 94.28  |
| <b>CAMKK1</b>         | 84.10  | 89.20  |  | 109.90 | 99.47  |  | 93.93  | 91.91  |
| <b>CAMKK2</b>         | 92.10  | 92.44  |  | 104.28 | 102.30 |  | 99.20  | 106.96 |
| <b>CDK1/cyclin A</b>  | 107.33 | 105.68 |  | 83.25  | 84.48  |  | 83.32  | 79.06  |
| <b>CDK1/cyclin B</b>  | 103.10 | 109.78 |  | 108.01 | 86.15  |  | 97.30  | 85.53  |
| <b>CDK2/cyclin A</b>  | 103.23 | 100.02 |  | 89.65  | 84.98  |  | 88.52  | 81.58  |
| <b>CDK2/cyclin E</b>  | 92.94  | 92.58  |  | 96.65  | 87.40  |  | 105.71 | 91.25  |
| <b>CDK3/cyclin E</b>  | 99.93  | 96.11  |  | 78.84  | 82.06  |  | 86.23  | 87.75  |
| <b>CDK4/cyclin D1</b> | 89.33  | 96.91  |  | 95.98  | 91.98  |  | 94.14  | 95.46  |
| <b>CDK4/cyclin D3</b> | 84.56  | 79.22  |  | 106.12 | 104.66 |  | 103.47 | 102.63 |
| <b>CDK5/p25</b>       | 98.60  | 103.35 |  | 91.79  | 83.81  |  | 89.99  | 87.83  |
| <b>CDK5/p35</b>       | 93.49  | 93.41  |  | 104.41 | 117.64 |  | 92.31  | 95.48  |
| <b>CDK6/cyclin D1</b> | 115.89 | 119.41 |  | 97.76  | 97.05  |  | 96.64  | 96.70  |
| <b>CDK6/cyclin D3</b> | 107.65 | 98.51  |  | 106.16 | 104.97 |  | 103.25 | 99.17  |
| <b>CDK7/cyclin H</b>  | 91.07  | 88.38  |  | 118.32 | 111.83 |  | 121.39 | 103.28 |
| <b>CDK9/cyclin K</b>  | 62.74  | 60.13  |  | 92.37  | 98.70  |  | 114.46 | 122.82 |
| <b>CDK9/cyclin T1</b> | 67.12  | 66.01  |  | 92.07  | 93.84  |  | 97.22  | 98.44  |
| <b>CHK1</b>           | 116.82 | 104.16 |  | 95.62  | 92.77  |  | 94.42  | 92.22  |
| <b>CHK2</b>           | 92.99  | 92.62  |  | 96.17  | 96.92  |  | 100.06 | 98.99  |
| <b>CK1a1</b>          | 104.33 | 102.41 |  | 81.11  | 92.10  |  | 79.96  | 79.83  |
| <b>CK1d</b>           | 88.66  | 86.60  |  | 93.55  | 96.16  |  | 92.42  | 99.69  |
| <b>CK1epsilon</b>     | 92.47  | 99.10  |  | 101.06 | 99.40  |  | 98.36  | 97.75  |
| <b>CK1g1</b>          | 102.38 | 107.59 |  | 100.22 | 104.51 |  | 103.19 | 113.87 |
| <b>CK1g2</b>          | 95.72  | 95.28  |  | 98.39  | 96.53  |  | 99.50  | 98.65  |
| <b>CK1g3</b>          | 98.59  | 99.41  |  | 98.53  | 96.23  |  | 94.05  | 100.42 |
| <b>CK2a</b>           | 79.75  | 74.90  |  | 114.67 | 116.27 |  | 112.26 | 113.03 |
| <b>CK2a2</b>          | 104.05 | 100.18 |  | 94.30  | 102.00 |  | 103.22 | 112.28 |
| <b>CLK1</b>           | 47.51  | 48.61  |  | 101.54 | 102.46 |  | 105.86 | 101.54 |
| <b>CLK2</b>           | 61.64  | 63.69  |  | 89.96  | 88.87  |  | 87.73  | 89.63  |
| <b>CLK3</b>           | 83.49  | 84.93  |  | 105.96 | 110.24 |  | 116.88 | 113.54 |
| <b>CLK4</b>           | 75.08  | 76.17  |  | 111.07 | 133.81 |  | 121.80 | 106.93 |
| <b>COT1/MAP3K8</b>    | 99.88  | 101.08 |  | 86.13  | 100.35 |  | 98.20  | 95.04  |
| <b>CSK</b>            | 93.79  | 89.77  |  | 87.24  | 88.37  |  | 86.05  | 77.46  |
| <b>CTK/MATK</b>       | 108.05 | 107.47 |  | 88.29  | 82.95  |  | 72.46  | 69.40  |
| <b>DAPK1</b>          | 73.95  | 75.10  |  | 98.47  | 101.92 |  | 96.66  | 93.38  |
| <b>DAPK2</b>          | 119.29 | 128.46 |  | 110.99 | 97.92  |  | 89.01  | 89.45  |
| <b>DCAMKL2</b>        | 101.97 | 98.51  |  | 100.73 | 99.05  |  | 98.93  | 98.97  |
| <b>DDR2</b>           | 1.45   | 1.84   |  | 9.87   | 9.40   |  | 109.43 | 100.89 |
| <b>DMPK</b>           | 76.43  | 97.20  |  | 108.58 | 84.94  |  | 93.89  | 92.90  |
| <b>DRAK1/STK17A</b>   | 99.05  | 102.64 |  | 88.59  | 96.87  |  | 103.78 | 90.45  |

|                      |        |        |  |        |        |  |        |        |
|----------------------|--------|--------|--|--------|--------|--|--------|--------|
| <b>DYRK1/DYRK1 A</b> | 101.05 | 102.69 |  | 101.90 | 105.95 |  | 94.28  | 92.97  |
| <b>DYRK1B</b>        | 101.82 | 105.00 |  | 99.54  | 103.33 |  | 99.02  | 103.66 |
| <b>DYRK2</b>         | 34.47  | 30.74  |  | 105.68 | 101.95 |  | 58.51  | 68.99  |
| <b>DYRK3</b>         | 49.62  | 51.15  |  | 96.59  | 92.54  |  | 100.12 | 97.32  |
| <b>DYRK4</b>         | 119.68 | 111.98 |  | 106.94 | 98.23  |  | 98.66  | 98.40  |
| <b>EGFR</b>          | 96.16  | 104.04 |  | 90.41  | 89.82  |  | 85.60  | 75.97  |
| <b>EPHA1</b>         | 60.22  | 60.77  |  | 77.30  | 69.39  |  | 110.31 | 111.85 |
| <b>EPHA2</b>         | 11.60  | 12.01  |  | 43.86  | 39.47  |  | 93.36  | 88.27  |
| <b>EPHA3</b>         | 50.84  | 44.39  |  | 61.83  | 62.66  |  | 92.54  | 92.43  |
| <b>EPHA4</b>         | 46.44  | 46.48  |  | 53.83  | 53.28  |  | 94.82  | 91.32  |
| <b>EPHA5</b>         | 47.58  | 45.39  |  | 81.17  | 82.99  |  | 110.81 | 98.93  |
| <b>EPHA6</b>         | 6.89   | 3.60   |  | 7.48   | 8.66   |  | 99.09  | 93.37  |
| <b>EPHA7</b>         | 8.84   | 8.59   |  | 3.12   | 3.15   |  | 33.14  | 30.92  |
| <b>EPHA8</b>         | 68.90  | 68.66  |  | 74.71  | 70.53  |  | 95.49  | 101.24 |
| <b>EPHB1</b>         | 45.20  | 44.53  |  | 56.31  | 53.61  |  | 99.86  | 94.08  |
| <b>EPHB2</b>         | 19.74  | 20.41  |  | 23.37  | 22.38  |  | 104.47 | 90.92  |
| <b>EPHB3</b>         | 42.20  | 39.48  |  | 38.82  | 42.12  |  | 69.91  | 68.38  |
| <b>EPHB4</b>         | 50.62  | 53.75  |  | 33.51  | 31.46  |  | 91.49  | 80.89  |
| <b>ERBB2/HER2</b>    | 116.26 | 104.49 |  | 98.40  | 109.89 |  | 102.02 | 94.56  |
| <b>ERBB4/HER4</b>    | 93.92  | 95.90  |  | 101.41 | 101.43 |  | 107.08 | 118.48 |
| <b>ERK1</b>          | 87.99  | 87.91  |  | 105.48 | 94.63  |  | 103.08 | 102.29 |
| <b>ERK2/MAPK1</b>    | 95.77  | 87.80  |  | 93.35  | 101.66 |  | 93.87  | 101.49 |
| <b>FAK/PTK2</b>      | 94.22  | 96.24  |  | 97.99  | 102.03 |  | 103.31 | 107.97 |
| <b>FER</b>           | 111.95 | 112.74 |  | 107.16 | 106.45 |  | 104.52 | 106.67 |
| <b>FES/FPS</b>       | 91.77  | 91.45  |  | 90.72  | 88.31  |  | 93.91  | 96.17  |
| <b>FGFR1</b>         | 63.54  | 60.13  |  | 78.32  | 80.78  |  | 94.16  | 98.33  |
| <b>FGFR2</b>         | 57.39  | 56.51  |  | 57.52  | 61.89  |  | 80.89  | 99.54  |
| <b>FGFR3</b>         | 61.99  | 60.97  |  | 81.37  | 88.92  |  | 93.69  | 94.36  |
| <b>FGFR4</b>         | 86.41  | 79.69  |  | 77.17  | 82.18  |  | 101.12 | 98.55  |
| <b>FGR</b>           | 79.17  | 84.71  |  | 91.89  | 85.93  |  | 97.11  | 93.04  |
| <b>FLT1/VEGFR1</b>   | 17.65  | 17.54  |  | 67.55  | 66.13  |  | 106.53 | 97.59  |
| <b>FLT3</b>          | -0.13  | 0.57   |  | 4.52   | 3.49   |  | 30.63  | 32.75  |
| <b>FLT4/VEGFR3</b>   | 13.89  | 14.60  |  | 61.82  | 67.01  |  | 122.67 | 124.20 |
| <b>FMS</b>           | 8.57   | 6.81   |  | 13.27  | 14.39  |  | 104.05 | 103.99 |
| <b>FRK/PTK5</b>      | 11.84  | 10.27  |  | 51.79  | 44.83  |  | 96.57  | 99.06  |
| <b>FYN</b>           | 92.74  | 95.98  |  | 112.56 | 107.80 |  | 105.80 | 101.42 |
| <b>GCK/MAP4K2</b>    | 78.20  | 86.40  |  | 41.56  | 42.09  |  | 17.36  | 17.72  |
| <b>GRK2</b>          | 102.19 | 101.96 |  | 99.38  | 95.13  |  | 97.82  | 96.10  |
| <b>GRK3</b>          | 92.52  | 94.51  |  | 84.42  | 98.18  |  | 80.64  | 77.29  |
| <b>GRK4</b>          | 96.00  | 102.76 |  | 78.36  | 75.38  |  | 78.34  | 75.67  |
| <b>GRK5</b>          | 91.98  | 104.34 |  | 110.59 | 105.00 |  | 82.61  | 83.55  |
| <b>GRK6</b>          | 105.08 | 105.65 |  | 84.15  | 96.50  |  | 81.38  | 90.43  |
| <b>GRK7</b>          | 92.48  | 90.99  |  | 118.48 | 114.37 |  | 106.18 | 118.42 |
| <b>GSK3a</b>         | 112.43 | 99.41  |  | 124.73 | 122.16 |  | 98.08  | 84.60  |
| <b>GSK3b</b>         | 139.66 | 153.59 |  | 111.17 | 101.13 |  | 104.32 | 100.02 |
| <b>Haspin</b>        | 96.36  | 102.92 |  | 63.13  | 50.74  |  | 64.96  | 71.43  |
| <b>HCK</b>           | 76.42  | 80.44  |  | 77.04  | 78.49  |  | 87.59  | 84.97  |
| <b>HGK/MAP4K4</b>    | 23.21  | 26.95  |  | 93.15  | 93.65  |  | 73.04  | 78.11  |

|                   |        |        |        |        |        |        |
|-------------------|--------|--------|--------|--------|--------|--------|
| HIPK1             | 72.95  | 76.29  | 94.84  | 93.40  | 94.81  | 94.81  |
| HIPK2             | 92.98  | 98.82  | 60.96  | 55.88  | 87.31  | 94.77  |
| HIPK3             | 87.50  | 96.87  | 76.37  | 77.47  | 83.86  | 85.71  |
| HIPK4             | 2.43   | 2.49   | 8.71   | 8.89   | 23.16  | 20.15  |
| IGF1R             | 112.19 | 92.05  | 92.52  | 93.84  | 96.27  | 93.26  |
| IKKa/CHUK         | 100.14 | 111.52 | 99.26  | 99.63  | 94.19  | 104.28 |
| IKKb/IKBKB        | 94.70  | 102.59 | 92.84  | 76.41  | 105.43 | 110.20 |
| IKKe/IKBKE        | 100.61 | 107.22 | 89.27  | 83.08  | 92.87  | 88.47  |
| IR                | 102.94 | 103.89 | 95.35  | 100.87 | 92.93  | 92.11  |
| IRAK1             | 1.91   | 2.16   | 95.64  | 95.00  | 91.97  | 92.94  |
| IRAK4             | 87.85  | 83.71  | 81.43  | 79.26  | 78.74  | 82.04  |
| IRR/INSRR         | 83.30  | 87.37  | 92.70  | 87.15  | 84.57  | 90.78  |
| ITK               | 100.73 | 99.77  | 114.60 | 107.65 | 119.33 | 114.65 |
| JAK1              | 123.45 | 118.83 | 100.90 | 98.36  | 102.70 | 115.58 |
| JAK2              | 119.24 | 121.55 | 88.36  | 97.66  | 128.35 | 108.93 |
| JAK3              | 118.91 | 117.41 | 82.10  | 82.54  | 85.50  | 83.05  |
| JNK1              | 108.76 | 106.36 | 103.66 | 101.20 | 84.44  | 85.69  |
| JNK2              | 83.37  | 85.53  | 92.61  | 112.03 | 108.93 | 110.29 |
| JNK3              | 90.57  | 99.66  | 109.80 | 104.41 | 116.31 | 103.96 |
| KDR/VEGFR2        | 15.93  | 17.64  | 56.63  | 49.01  | 75.25  | 68.93  |
| KHS/MAP4K5        | 26.45  | 23.36  | 21.58  | 25.04  | 49.73  | 50.75  |
| LCK               | 47.44  | 47.78  | 69.28  | 67.28  | 85.27  | 85.45  |
| LIMK1             | 61.55  | 66.03  | 90.99  | 94.65  | 96.03  | 98.19  |
| LKB1              | 121.94 | 121.44 | 91.78  | 90.74  | 99.42  | 99.94  |
| LOK/STK10         | 11.24  | 10.77  | 55.64  | 58.29  | 88.44  | 92.67  |
| LRRK2             | 39.40  | 41.76  | 49.09  | 51.17  | 73.90  | 69.61  |
| LYN               | 51.62  | 58.53  | 77.72  | 83.64  | 107.63 | 102.64 |
| LYN B             | 73.13  | 73.61  | 95.11  | 104.62 | 110.06 | 113.23 |
| MAPKAPK2          | 113.45 | 112.58 | 84.97  | 95.09  | 96.42  | 89.34  |
| MAPKAPK3          | 102.83 | 105.42 | 103.71 | 98.74  | 94.40  | 107.23 |
| MAPKAPK5/PR<br>AK | 108.64 | 112.74 | 97.78  | 84.16  | 100.79 | 100.06 |
| MARK1             | 77.83  | 93.22  | 136.10 | 130.88 | 132.76 | 129.51 |
| MARK2/PAR-<br>1Ba | 107.77 | 96.43  | 130.68 | 127.37 | 138.58 | 134.53 |
| MARK3             | 106.05 | 89.21  | 93.27  | 92.15  | 86.23  | 88.62  |
| MARK4             | 106.32 | 110.95 | 96.52  | 100.26 | 74.16  | 99.39  |
| MEK1              | 71.76  | 83.09  | 106.75 | 107.71 | 90.39  | 89.77  |
| MEK2              | 42.07  | 43.18  | 74.15  | 77.56  | 102.18 | 99.95  |
| MEKK2             | 103.86 | 103.29 | 113.27 | 112.04 | 109.54 | 118.72 |
| MEKK3             | 103.31 | 102.47 | 116.05 | 109.09 | 103.79 | 108.02 |
| MELK              | 91.58  | 102.36 | 89.90  | 95.54  | 86.92  | 86.64  |
| MINK/MINK1        | 11.07  | 10.51  | 105.93 | 108.47 | 102.19 | 100.86 |
| MKK6              | 86.56  | 85.62  | 99.26  | 102.09 | 99.74  | 104.15 |
| MLCK/MYLK         | 87.83  | 91.46  | 85.53  | 85.91  | 93.05  | 86.38  |
| MLCK2/MYLK2       | 33.83  | 32.34  | 85.75  | 85.68  | 100.01 | 105.37 |
| MLK1/MAP3K9       | 98.93  | 98.84  | 95.09  | 96.47  | 107.16 | 109.77 |
| MLK2/MAP3K10      | 85.37  | 89.18  | 68.50  | 66.31  | 84.85  | 85.34  |
| MLK3/MAP3K11      | 57.05  | 70.99  | 57.40  | 60.06  | 76.61  | 78.99  |

|                         |        |        |        |        |        |        |
|-------------------------|--------|--------|--------|--------|--------|--------|
| <b>MNK1</b>             | 4.25   | 4.82   | 77.43  | 78.82  | 89.02  | 94.51  |
| <b>MNK2</b>             | 6.56   | 7.72   | 70.63  | 73.22  | 91.54  | 91.10  |
| <b>MRCKa/CDC42 BPA</b>  | 100.31 | 102.21 | 105.09 | 122.00 | 117.72 | 118.76 |
| <b>MRCKb/CDC42 BPB</b>  | 91.43  | 78.67  | 87.34  | 97.47  | 85.75  | 98.40  |
| <b>MSK1/RPS6KA5</b>     | 93.86  | 88.15  | 72.26  | 80.58  | 85.20  | 86.54  |
| <b>MSK2/RPS6KA4</b>     | 72.13  | 69.98  | 95.01  | 82.86  | 89.55  | 93.70  |
| <b>MSSK1/STK23</b>      | 75.07  | 67.91  | 70.32  | 65.26  | 105.81 | 107.51 |
| <b>MST1/STK4</b>        | 116.98 | 118.47 | 102.15 | 104.85 | 99.34  | 95.76  |
| <b>MST2/STK3</b>        | 108.98 | 108.71 | 86.77  | 86.01  | 85.79  | 85.25  |
| <b>MST3/STK24</b>       | 142.84 | 129.15 | 262.55 | 257.28 | 114.52 | 113.33 |
| <b>MST4</b>             | 125.29 | 126.96 | 115.21 | 121.27 | 108.58 | 113.86 |
| <b>MUSK</b>             | 80.57  | 79.38  | 98.11  | 101.89 | 97.44  | 99.56  |
| <b>MYO3b</b>            | 97.99  | 100.77 | 76.94  | 75.02  | 70.07  | 68.98  |
| <b>NEK1</b>             | 46.92  | 55.60  | 54.92  | 54.25  | 59.11  | 64.29  |
| <b>NEK11</b>            | 93.08  | 78.99  | 89.28  | 81.32  | 102.09 | 91.75  |
| <b>NEK2</b>             | 111.23 | 109.65 | 117.02 | 114.52 | 102.92 | 108.77 |
| <b>NEK3</b>             | 82.72  | 96.86  | 84.01  | 94.46  | 84.91  | 97.85  |
| <b>NEK4</b>             | 70.81  | 72.14  | 101.69 | 95.09  | 98.67  | 101.84 |
| <b>NEK6</b>             | 114.84 | 109.68 | 96.95  | 94.72  | 95.52  | 94.55  |
| <b>NEK7</b>             | 127.50 | 123.60 | 141.38 | 145.91 | 101.02 | 103.09 |
| <b>NEK9</b>             | 96.20  | 88.77  | 93.23  | 91.06  | 103.19 | 108.83 |
| <b>NIK/MAP3K14</b>      | 99.53  | 107.19 | 115.85 | 136.44 | 123.40 | 136.87 |
| <b>NLK</b>              | 85.98  | 79.27  | 110.40 | 113.20 | 104.14 | 109.58 |
| <b>OSR1/OXSR1</b>       | 110.03 | 108.87 | 96.80  | 90.06  | 98.77  | 100.36 |
| <b>P38a/MAPK14</b>      | 31.63  | 32.45  | 80.51  | 78.52  | 92.57  | 93.41  |
| <b>P38b/MAPK11</b>      | 22.11  | 20.98  | 89.04  | 84.18  | 102.46 | 98.32  |
| <b>P38d/MAPK13</b>      | 50.38  | 51.78  | 85.51  | 85.42  | 90.77  | 91.35  |
| <b>P38g</b>             | 30.78  | 28.40  | 51.65  | 51.57  | 50.65  | 62.83  |
| <b>p70S6K/RPS6K B1</b>  | 65.43  | 63.87  | 28.98  | 33.99  | 119.11 | 105.69 |
| <b>p70S6Kb/RPS6 KB2</b> | 104.26 | 108.38 | 72.61  | 72.54  | 88.15  | 96.18  |
| <b>PAK1</b>             | 104.36 | 104.16 | 117.95 | 118.58 | 112.99 | 117.22 |
| <b>PAK2</b>             | 108.68 | 105.92 | 98.65  | 100.70 | 101.17 | 99.56  |
| <b>PAK3</b>             | 106.37 | 107.18 | 97.63  | 94.41  | 96.54  | 92.25  |
| <b>PAK4</b>             | 92.27  | 96.80  | 103.04 | 97.77  | 97.44  | 100.66 |
| <b>PAK5</b>             | 106.91 | 104.10 | 102.07 | 92.27  | 101.06 | 116.80 |
| <b>PAK6</b>             | 81.12  | 88.78  | 94.16  | 86.86  | 98.01  | 103.43 |
| <b>PASK</b>             | 106.50 | 103.88 | 102.82 | 84.39  | 89.68  | 95.61  |
| <b>PBK/TOPK</b>         | 100.78 | 100.27 | 94.28  | 106.79 | 96.63  | 94.23  |
| <b>PDGFRa</b>           | 5.61   | 5.35   | 17.32  | 15.18  | 92.88  | 92.97  |
| <b>PDGFRb</b>           | 8.07   | 7.86   | 37.29  | 36.72  | 95.22  | 91.38  |
| <b>PDK1/PDPK1</b>       | 100.26 | 97.15  | 85.67  | 92.52  | 85.23  | 71.80  |
| <b>PHKg1</b>            | 50.99  | 51.88  | 87.53  | 84.73  | 79.18  | 87.75  |
| <b>PHKg2</b>            | 114.30 | 115.99 | 84.57  | 97.62  | 97.52  | 88.28  |
| <b>PIM1</b>             | 98.98  | 100.15 | 97.17  | 105.38 | 99.78  | 101.58 |
| <b>PIM2</b>             | 109.96 | 109.28 | 98.86  | 96.63  | 98.04  | 104.43 |
| <b>PIM3</b>             | 132.55 | 136.18 | 91.10  | 88.65  | 86.75  | 109.19 |

|                     |        |        |  |        |        |  |        |        |
|---------------------|--------|--------|--|--------|--------|--|--------|--------|
| <b>PKA</b>          | 89.06  | 104.54 |  | 99.15  | 90.96  |  | 101.33 | 111.90 |
| <b>PKAcg</b>        | 66.38  | 58.95  |  | 138.19 | 128.96 |  | 122.80 | 115.90 |
| <b>PKCa</b>         | 118.21 | 98.10  |  | 69.29  | 67.61  |  | 75.18  | 76.62  |
| <b>PKCb1</b>        | 94.19  | 108.14 |  | 97.81  | 91.02  |  | 99.36  | 96.21  |
| <b>PKCb2</b>        | 90.73  | 95.49  |  | 98.31  | 89.84  |  | 98.81  | 91.26  |
| <b>PKCd</b>         | 112.50 | 105.83 |  | 93.89  | 88.16  |  | 92.37  | 88.60  |
| <b>PKCepsilon</b>   | 97.88  | 98.47  |  | 95.77  | 113.74 |  | 103.72 | 101.29 |
| <b>PKCeta</b>       | 100.63 | 89.61  |  | 89.68  | 89.26  |  | 95.50  | 89.41  |
| <b>PKCg</b>         | 116.97 | 119.84 |  | 108.28 | 98.20  |  | 87.34  | 81.40  |
| <b>PKCiota</b>      | 103.00 | 102.43 |  | 88.88  | 100.44 |  | 104.36 | 100.38 |
| <b>PKCmu/PRKD1</b>  | 98.97  | 87.16  |  | 104.21 | 110.65 |  | 95.44  | 106.40 |
| <b>PKCnu/PRKD3</b>  | 75.96  | 74.80  |  | 89.44  | 88.09  |  | 88.56  | 90.11  |
| <b>PKCtheta</b>     | 89.93  | 75.26  |  | 91.18  | 106.51 |  | 98.17  | 87.55  |
| <b>PKCzeta</b>      | 101.20 | 101.67 |  | 86.11  | 97.22  |  | 65.86  | 54.64  |
| <b>PKD2/PRKD2</b>   | 77.64  | 74.28  |  | 100.02 | 90.98  |  | 86.04  | 92.19  |
| <b>PKG1a</b>        | 78.87  | 77.53  |  | 87.99  | 86.04  |  | 110.53 | 95.46  |
| <b>PKG1b</b>        | 62.51  | 58.26  |  | 100.65 | 97.75  |  | 86.22  | 93.21  |
| <b>PKG2/PRKG2</b>   | 101.15 | 105.27 |  | 102.65 | 98.61  |  | 88.59  | 93.28  |
| <b>PKN1/PRK1</b>    | 101.25 | 100.27 |  | 120.24 | 104.35 |  | 113.76 | 96.93  |
| <b>PKN2/PRK2</b>    | 90.27  | 96.37  |  | 89.97  | 72.50  |  | 99.69  | 100.78 |
| <b>PLK1</b>         | 94.02  | 99.29  |  | 99.36  | 92.99  |  | 96.54  | 99.99  |
| <b>PLK2</b>         | 106.41 | 97.94  |  | 48.79  | 42.49  |  | 108.29 | 100.73 |
| <b>PLK3</b>         | 99.76  | 91.96  |  | 102.68 | 104.83 |  | 107.93 | 105.90 |
| <b>PRKX</b>         | 104.20 | 107.77 |  | 106.73 | 108.59 |  | 97.99  | 85.44  |
| <b>PYK2</b>         | 99.41  | 98.63  |  | 97.71  | 95.94  |  | 96.87  | 95.93  |
| <b>RAF1</b>         | 7.29   | 7.25   |  | 46.61  | 40.79  |  | 93.89  | 89.52  |
| <b>RET</b>          | 5.91   | 7.07   |  | 2.80   | 2.99   |  | 89.11  | 98.17  |
| <b>RIPK2</b>        | 28.58  | 28.65  |  | 94.49  | 104.57 |  | 101.34 | 104.16 |
| <b>RIPK5</b>        | 105.28 | 116.14 |  | 105.03 | 115.97 |  | 105.48 | 93.95  |
| <b>ROCK1</b>        | 76.10  | 75.93  |  | 105.14 | 123.56 |  | 92.09  | 83.00  |
| <b>ROCK2</b>        | 73.95  | 62.90  |  | 78.15  | 77.05  |  | 102.46 | 105.06 |
| <b>RON/MST1R</b>    | 30.82  | 19.12  |  | 95.95  | 97.67  |  | 96.30  | 94.10  |
| <b>ROS/ROS1</b>     | 59.72  | 66.33  |  | 86.75  | 72.98  |  | 85.34  | 94.65  |
| <b>RSK1</b>         | 76.44  | 80.16  |  | 65.96  | 67.72  |  | 105.50 | 106.27 |
| <b>RSK2</b>         | 99.86  | 85.19  |  | 93.45  | 89.77  |  | 103.59 | 94.56  |
| <b>RSK3</b>         | 69.60  | 71.32  |  | 71.61  | 64.96  |  | 93.24  | 94.61  |
| <b>RSK4</b>         | 105.45 | 107.39 |  | 95.18  | 104.36 |  | 100.18 | 103.77 |
| <b>SGK1</b>         | 92.57  | 86.07  |  | 98.23  | 106.77 |  | 104.07 | 102.51 |
| <b>SGK2</b>         | 110.11 | 105.07 |  | 94.36  | 94.80  |  | 87.25  | 96.03  |
| <b>SGK3/SGKL</b>    | 98.74  | 107.18 |  | 87.92  | 90.68  |  | 99.33  | 85.59  |
| <b>SIK2</b>         | 113.37 | 112.28 |  | 97.69  | 95.09  |  | 98.13  | 101.66 |
| <b>SLK/STK2</b>     | 31.11  | 33.91  |  | 55.13  | 53.02  |  | 72.07  | 89.02  |
| <b>SNARK/NUAK2</b>  | 118.93 | 119.89 |  | 101.16 | 108.61 |  | 108.56 | 100.47 |
| <b>SRMS</b>         | 128.71 | 124.44 |  | 91.80  | 90.67  |  | 86.88  | 86.09  |
| <b>SRPK1</b>        | 73.86  | 96.57  |  | 98.08  | 98.08  |  | 101.37 | 98.75  |
| <b>SRPK2</b>        | 103.85 | 106.41 |  | 103.89 | 85.32  |  | 114.43 | 83.44  |
| <b>STK16</b>        | 109.41 | 107.73 |  | 98.04  | 95.04  |  | 97.78  | 83.11  |
| <b>STK22D/TSSK1</b> | 106.63 | 107.45 |  | 90.22  | 98.30  |  | 93.81  | 94.65  |
| <b>STK25/YSK1</b>   | 106.18 | 110.89 |  | 115.40 | 114.46 |  | 109.47 | 101.67 |

|             |        |        |  |        |        |  |        |        |
|-------------|--------|--------|--|--------|--------|--|--------|--------|
| STK33       | 61.17  | 64.38  |  | 100.25 | 98.99  |  | 108.82 | 108.41 |
| STK38/NDR1  | 94.86  | 100.89 |  | 80.97  | 78.52  |  | 94.82  | 98.33  |
| STK39/STLK3 | 103.12 | 103.97 |  | 73.61  | 73.54  |  | 92.35  | 92.79  |
| SYK         | 111.09 | 113.52 |  | 107.49 | 106.47 |  | 100.52 | 115.11 |
| TAK1        | 59.83  | 58.93  |  | 60.94  | 57.61  |  | 45.44  | 44.05  |
| TAOK1       | 56.32  | 57.77  |  | 99.82  | 94.95  |  | 91.31  | 101.17 |
| TAOK2/TAO1  | 22.06  | 22.24  |  | 80.34  | 75.72  |  | 84.25  | 81.95  |
| TAOK3/JIK   | 69.75  | 76.91  |  | 104.03 | 102.38 |  | 106.72 | 97.47  |
| TBK1        | 103.73 | 100.17 |  | 98.03  | 101.26 |  | 98.79  | 91.39  |
| TEC         | 99.25  | 101.80 |  | 105.63 | 100.71 |  | 102.21 | 104.77 |
| TGFBR2      | 110.22 | 107.83 |  | 89.15  | 87.46  |  | 93.36  | 90.31  |
| TIE2/TEK    | 65.91  | 67.03  |  | 33.78  | 35.02  |  | 97.73  | 95.80  |
| TLK2        | 100.18 | 97.60  |  | 89.06  | 88.58  |  | 96.76  | 90.74  |
| TRKA        | 11.51  | 11.64  |  | 25.13  | 28.67  |  | 29.46  | 25.50  |
| TRKB        | 13.47  | 13.39  |  | 38.14  | 39.17  |  | 62.64  | 64.48  |
| TRKC        | 6.30   | 4.80   |  | 16.57  | 15.93  |  | 31.56  | 29.58  |
| TSSK2       | 98.31  | 105.87 |  | 86.45  | 83.83  |  | 92.32  | 85.78  |
| TTK         | 77.82  | 84.83  |  | 102.71 | 82.25  |  | 111.12 | 96.48  |
| TXK         | 104.23 | 109.05 |  | 101.86 | 110.14 |  | 101.74 | 110.74 |
| TYK1/LTK    | 109.75 | 108.24 |  | 69.80  | 75.12  |  | 90.47  | 98.78  |
| TYK2        | 107.72 | 114.93 |  | 93.05  | 99.20  |  | 105.29 | 104.10 |
| TYRO3/SKY   | 59.41  | 61.89  |  | 97.13  | 94.56  |  | 102.78 | 90.51  |
| ULK1        | 121.06 | 120.87 |  | 104.67 | 93.92  |  | 100.70 | 100.92 |
| ULK2        | 93.07  | 92.71  |  | 108.08 | 107.33 |  | 102.87 | 100.20 |
| ULK3        | 86.23  | 97.25  |  | 89.75  | 92.72  |  | 92.16  | 96.59  |
| VRK1        | 97.92  | 97.56  |  | 103.16 | 106.51 |  | 95.20  | 99.04  |
| WEE1        | 109.29 | 113.84 |  | 116.19 | 122.51 |  | 111.00 | 113.20 |
| WNK2        | 95.91  | 101.40 |  | 93.20  | 93.10  |  | 96.25  | 90.63  |
| WNK3        | 101.40 | 103.27 |  | 99.59  | 109.97 |  | 103.22 | 104.71 |
| YES/YES1    | 83.84  | 86.46  |  | 70.06  | 65.97  |  | 96.29  | 91.86  |
| ZAK/MLTK    | 57.62  | 61.64  |  | 82.43  | 83.60  |  | 99.00  | 96.42  |
| ZAP70       | 100.37 | 108.58 |  | 98.86  | 103.78 |  | 125.04 | 107.28 |
| ZIPK/DAPK3  | 99.20  | 94.35  |  | 104.01 | 109.90 |  | 104.39 | 95.28  |

Compounds **1** and **18** were tested against 317 kinases using a P33 radiolabeled assay at Reaction Corp Biology.<sup>20</sup> Compounds were tested in single dose duplicate mode at 1  $\mu$ M. Reactions were carried out at 10  $\mu$ M ATP. Data is reported as % enzyme activity (relative to DMSO controls).

| Kinase:     | Compound 1 |        | Compound 18 |        |
|-------------|------------|--------|-------------|--------|
|             | Data 1     | Data 2 | Data 1      | Data 2 |
| ABL1        | 100.03     | 81.57  | 91.31       | 84.56  |
| ABL2/ARG    | 95.30      | 95.85  | 95.80       | 80.83  |
| ACK1        | 97.30      | 92.73  | 90.05       | 90.14  |
| AKT1        | 104.81     | 100.50 | 101.60      | 98.72  |
| AKT2        | 101.29     | 109.26 | 97.85       | 99.22  |
| AKT3        | 103.70     | 95.87  | 92.46       | 95.95  |
| ALK         | 105.87     | 105.29 | 77.23       | 78.42  |
| ALK1/ACVRL1 | 99.73      | 99.73  | 101.34      | 102.99 |

|                       |        |        |  |        |        |
|-----------------------|--------|--------|--|--------|--------|
| <b>ALK2/ACVR1</b>     | 108.50 | 90.83  |  | 101.07 | 95.33  |
| <b>ALK4/ACVR1B</b>    | 103.40 | 92.32  |  | 96.75  | 91.14  |
| <b>ALK5/TGFBR1</b>    | 94.67  | 97.63  |  | 95.26  | 96.47  |
| <b>ALK6/BMPR1B</b>    | 88.29  | 104.28 |  | 92.15  | 100.84 |
| <b>ARAF</b>           | 94.68  | 93.16  |  | 97.39  | 95.08  |
| <b>ARK5/NUAK1</b>     | 100.88 | 102.28 |  | 94.33  | 91.73  |
| <b>ASK1/MAP3K5</b>    | 102.40 | 98.47  |  | 103.04 | 100.61 |
| <b>Aurora A</b>       | 82.84  | 82.22  |  | 88.19  | 79.41  |
| <b>Aurora B</b>       | 8.72   | 10.31  |  | 87.77  | 90.05  |
| <b>Aurora C</b>       | 81.25  | 67.04  |  | 97.90  | 102.84 |
| <b>AXL</b>            | 84.54  | 73.70  |  | 101.23 | 97.54  |
| <b>BLK</b>            | 89.33  | 89.29  |  | 86.27  | 80.58  |
| <b>BMPR2</b>          | 83.12  | 79.19  |  | 91.94  | 98.33  |
| <b>BMX/ETK</b>        | 103.16 | 101.02 |  | 83.01  | 78.83  |
| <b>BRAF</b>           | 70.08  | 66.14  |  | 76.54  | 89.77  |
| <b>BRK</b>            | 82.57  | 77.55  |  | 93.65  | 93.55  |
| <b>BRSK1</b>          | 94.65  | 92.31  |  | 92.74  | 93.97  |
| <b>BRSK2</b>          | 97.84  | 82.79  |  | 107.82 | 98.79  |
| <b>BTK</b>            | 81.34  | 78.37  |  | 74.80  | 79.48  |
| <b>c-Kit</b>          | 12.73  | 11.93  |  | 78.32  | 78.02  |
| <b>c-MER</b>          | 86.45  | 88.06  |  | 95.76  | 100.67 |
| <b>c-MET</b>          | 51.28  | 51.51  |  | 86.89  | 89.46  |
| <b>c-Src</b>          | 78.04  | 74.26  |  | 89.33  | 89.45  |
| <b>CAMK1a</b>         | 114.87 | 108.53 |  | 105.44 | 88.03  |
| <b>CAMK1b</b>         | 101.09 | 103.47 |  | 98.90  | 94.51  |
| <b>CAMK1d</b>         | 92.49  | 97.09  |  | 72.68  | 63.09  |
| <b>CAMK1g</b>         | 96.48  | 88.27  |  | 92.05  | 86.08  |
| <b>CAMK2a</b>         | 125.45 | 113.67 |  | 94.68  | 99.54  |
| <b>CAMK2b</b>         | 101.53 | 96.26  |  | 103.38 | 89.35  |
| <b>CAMK2d</b>         | 107.30 | 106.44 |  | 107.86 | 102.40 |
| <b>CAMK2g</b>         | 122.89 | 105.66 |  | 107.32 | 104.49 |
| <b>CAMK4</b>          | 92.94  | 82.45  |  | 85.96  | 87.56  |
| <b>CAMKK1</b>         | 100.67 | 83.27  |  | 94.68  | 79.99  |
| <b>CAMKK2</b>         | 106.28 | 120.41 |  | 94.10  | 101.68 |
| <b>CDK1/cyclin A</b>  | 85.95  | 80.01  |  | 105.48 | 98.38  |
| <b>CDK1/cyclin B</b>  | 83.10  | 80.09  |  | 99.96  | 91.20  |
| <b>CDK1/cyclin E</b>  | 111.98 | 101.67 |  | 97.58  | 91.97  |
| <b>CDK2/cyclin A</b>  | 95.68  | 93.65  |  | 95.41  | 92.24  |
| <b>CDK2/cyclin E</b>  | 95.89  | 95.45  |  | 84.29  | 78.43  |
| <b>CDK3/cyclin E</b>  | 105.80 | 93.58  |  | 97.58  | 90.42  |
| <b>CDK4/cyclin D1</b> | 105.61 | 100.06 |  | 98.56  | 97.74  |
| <b>CDK4/cyclin D3</b> | 78.68  | 85.73  |  | 96.26  | 100.05 |
| <b>CDK5/p25</b>       | 93.79  | 90.48  |  | 64.33  | 59.21  |
| <b>CDK5/p35</b>       | 100.72 | 92.16  |  | 87.61  | 91.21  |
| <b>CDK6/cyclin D1</b> | 102.11 | 99.38  |  | 96.21  | 92.10  |
| <b>CDK6/cyclin D3</b> | 83.43  | 95.72  |  | 78.64  | 87.46  |
| <b>CDK7/cyclin H</b>  | 97.56  | 89.37  |  | 89.03  | 80.77  |
| <b>CDK9/cyclin K</b>  | 107.69 | 96.50  |  | 100.39 | 88.95  |
| <b>CDK9/cyclin T1</b> | 105.38 | 91.23  |  | 91.20  | 112.02 |



|              |        |        |  |        |        |
|--------------|--------|--------|--|--------|--------|
| CHK1         | 100.20 | 100.44 |  | 102.44 | 96.49  |
| CHK2         | 104.61 | 98.18  |  | 101.31 | 96.64  |
| CK1a1        | 92.43  | 93.37  |  | 102.36 | 95.20  |
| CK1d         | 104.04 | 105.68 |  | 91.82  | 97.19  |
| CK1epsilon   | 104.23 | 90.17  |  | 83.77  | 76.75  |
| CK1g1        | 111.64 | 100.36 |  | 115.58 | 103.60 |
| CK1g2        | 61.97  | 73.09  |  | 99.84  | 101.93 |
| CK1g3        | 108.13 | 102.42 |  | 105.10 | 93.28  |
| CK2a         | 120.94 | 126.57 |  | 116.45 | 102.88 |
| CK2a2        | 102.68 | 107.39 |  | 107.00 | 100.41 |
| CLK1         | 82.61  | 76.67  |  | 60.30  | 62.57  |
| CLK2         | 91.98  | 89.02  |  | 72.96  | 71.69  |
| CLK3         | 92.81  | 87.97  |  | 98.48  | 96.99  |
| CLK4         | 90.94  | 85.17  |  | 81.31  | 71.10  |
| COT1/MAP3K8  | 103.66 | 98.99  |  | 99.65  | 105.95 |
| CSK          | 96.38  | 97.20  |  | 100.54 | 96.12  |
| CTK/MATK     | 95.72  | 95.46  |  | 100.41 | 99.87  |
| DAPK1        | 77.28  | 64.26  |  | 89.87  | 87.24  |
| DAPK2        | 96.37  | 106.93 |  | 97.23  | 101.10 |
| DCAMKL1      | 107.70 | 93.55  |  | 127.30 | 121.52 |
| DCAMKL2      | 102.32 | 98.13  |  | 120.01 | 124.05 |
| DDR1         | 0.24   | -0.53  |  | 57.57  | 49.67  |
| DDR2         | 2.13   | 2.25   |  | 106.72 | 103.69 |
| DMPK         | 113.22 | 111.35 |  | 106.39 | 106.44 |
| DRAK1/STK17A | 103.55 | 106.19 |  | 92.09  | 77.34  |
| DYRK1/DYRK1A | 91.62  | 98.06  |  | 68.37  | 61.58  |
| DYRK1B       | 91.55  | 96.03  |  | 65.69  | 65.11  |
| DYRK2        | 118.27 | 112.07 |  | 92.82  | 95.46  |
| DYRK3        | 65.85  | 80.82  |  | 83.63  | 92.50  |
| DYRK4        | 98.32  | 96.36  |  | 91.26  | 89.10  |
| EGFR         | 116.63 | 100.17 |  | 108.97 | 101.76 |
| EPHA1        | 117.34 | 127.28 |  | 86.49  | 113.24 |
| EPHA2        | 17.10  | 17.30  |  | 105.83 | 106.94 |
| EPHA3        | 73.39  | 62.53  |  | 93.63  | 90.14  |
| EPHA4        | 47.76  | 48.20  |  | 89.75  | 90.92  |
| EPHA5        | 49.57  | 53.58  |  | 75.96  | 90.83  |
| EPHA6        | 3.88   | 3.18   |  | 47.30  | 43.80  |
| EPHA7        | 13.82  | 15.33  |  | 17.45  | 21.06  |
| EPHA8        | 69.26  | 69.37  |  | 98.20  | 97.26  |
| EPHB1        | 45.38  | 49.56  |  | 79.62  | 97.30  |
| EPHB2        | 24.62  | 22.80  |  | 97.28  | 101.11 |
| EPHB3        | 52.86  | 41.70  |  | 93.89  | 93.50  |
| EPHB4        | 38.81  | 29.15  |  | 98.37  | 89.69  |
| ERBB2/HER2   | 99.56  | 97.41  |  | 99.12  | 98.00  |
| ERBB4/HER4   | 96.97  | 99.38  |  | 93.85  | 96.58  |
| ERK1         | 98.75  | 96.75  |  | 118.02 | 98.38  |
| ERK2/MAPK1   | 100.13 | 100.01 |  | 107.12 | 105.11 |
| ERK5/MAPK7   | 105.75 | 104.27 |  | 108.96 | 99.31  |
| FAK/PTK2     | 106.09 | 104.50 |  | 82.54  | 82.33  |

|                    |        |        |  |        |        |
|--------------------|--------|--------|--|--------|--------|
| <b>FER</b>         | 106.80 | 93.87  |  | 94.21  | 87.87  |
| <b>FES/FPS</b>     | 79.62  | 83.12  |  | 73.04  | 81.35  |
| <b>FGFR1</b>       | 65.17  | 62.72  |  | 72.79  | 73.69  |
| <b>FGFR2</b>       | 72.45  | 65.14  |  | 76.80  | 77.25  |
| <b>FGFR3</b>       | 65.92  | 68.38  |  | 53.37  | 63.85  |
| <b>FGFR4</b>       | 119.90 | 116.72 |  | 106.77 | 102.82 |
| <b>FGR</b>         | 91.23  | 90.83  |  | 103.08 | 101.48 |
| <b>FLT1/VEGFR1</b> | 57.40  | 57.90  |  | 103.54 | 95.30  |
| <b>FLT3</b>        | 5.67   | 5.71   |  | 32.79  | 30.58  |
| <b>FLT4/VEGFR3</b> | 53.30  | 55.97  |  | 76.58  | 82.76  |
| <b>FMS</b>         | 15.95  | 14.15  |  | 102.29 | 108.28 |
| <b>FRK/PTK5</b>    | 41.15  | 43.24  |  | 86.09  | 86.93  |
| <b>FYN</b>         | 102.80 | 97.86  |  | 93.20  | 90.43  |
| <b>GCK/MAP4K2</b>  | 98.82  | 75.41  |  | 6.45   | 7.06   |
| <b>GRK1</b>        | 89.77  | 88.00  |  | 98.29  | 93.53  |
| <b>GRK2</b>        | 104.57 | 104.12 |  | 108.40 | 103.77 |
| <b>GRK3</b>        | 112.42 | 102.85 |  | 112.65 | 119.62 |
| <b>GRK4</b>        | 100.23 | 99.78  |  | 103.47 | 102.17 |
| <b>GRK5</b>        | 95.13  | 84.40  |  | 98.27  | 83.32  |
| <b>GRK6</b>        | 100.21 | 89.02  |  | 108.87 | 109.66 |
| <b>GRK7</b>        | 87.13  | 89.49  |  | 97.82  | 99.23  |
| <b>GSK3a</b>       | 66.07  | 67.86  |  | 61.15  | 57.73  |
| <b>GSK3b</b>       | 97.58  | 102.93 |  | 69.33  | 77.06  |
| <b>Haspin</b>      | 99.58  | 104.22 |  | 57.86  | 60.96  |
| <b>HCK</b>         | 104.84 | 96.05  |  | 95.22  | 93.56  |
| <b>HGK/MAP4K4</b>  | 71.98  | 78.75  |  | 19.79  | 18.62  |
| <b>HIPK1</b>       | 100.15 | 104.08 |  | 57.27  | 62.04  |
| <b>HIPK2</b>       | 69.63  | 62.45  |  | 69.28  | 66.69  |
| <b>HIPK3</b>       | 87.86  | 74.38  |  | 68.17  | 69.23  |
| <b>HIPK4</b>       | 2.56   | 2.61   |  | 18.74  | 18.59  |
| <b>HPK1/MAP4K1</b> | 83.44  | 80.33  |  | 34.16  | 33.96  |
| <b>IGF1R</b>       | 100.90 | 97.06  |  | 104.03 | 109.16 |
| <b>IKKa/CHUK</b>   | 109.92 | 107.21 |  | 89.54  | 88.11  |
| <b>IKKb/IKBKB</b>  | 98.82  | 101.41 |  | 70.53  | 88.00  |
| <b>IKKe/IKBKE</b>  | 98.50  | 99.79  |  | 93.72  | 92.43  |
| <b>IR</b>          | 88.11  | 85.22  |  | 76.23  | 74.78  |
| <b>IRAK1</b>       | 78.50  | 74.52  |  | 106.86 | 103.86 |
| <b>IRAK4</b>       | 95.98  | 104.94 |  | 137.44 | 116.25 |
| <b>IRR/INSRR</b>   | 92.57  | 81.14  |  | 78.29  | 93.60  |
| <b>ITK</b>         | 104.42 | 103.22 |  | 101.39 | 98.79  |
| <b>JAK1</b>        | 99.07  | 76.72  |  | 97.11  | 98.27  |
| <b>JAK2</b>        | 67.70  | 64.73  |  | 94.63  | 89.83  |
| <b>JAK3</b>        | 105.05 | 107.48 |  | 98.88  | 98.60  |
| <b>JNK1</b>        | 81.15  | 85.90  |  | 103.16 | 92.69  |
| <b>JNK2</b>        | 107.58 | 105.25 |  | 93.35  | 91.60  |
| <b>JNK3</b>        | 98.20  | 103.59 |  | 99.44  | 96.87  |
| <b>KDR/VEGFR2</b>  | 22.39  | 25.64  |  | 79.02  | 79.19  |
| <b>KHS/MAP4K5</b>  | 17.38  | 15.11  |  | 36.19  | 31.07  |
| <b>LATS2</b>       | 83.97  | 82.80  |  | 86.24  | 85.22  |

|                        |        |        |  |        |        |
|------------------------|--------|--------|--|--------|--------|
| <b>LCK</b>             | 96.25  | 99.16  |  | 92.86  | 97.09  |
| <b>LIMK1</b>           | 132.07 | 101.53 |  | 100.50 | 96.35  |
| <b>LKB1</b>            | 92.32  | 94.22  |  | 99.78  | 96.51  |
| <b>LOK/STK10</b>       | 31.00  | 25.14  |  | 90.81  | 79.74  |
| <b>LRRK2</b>           | 98.72  | 91.85  |  | 76.87  | 76.64  |
| <b>LYN</b>             | 86.56  | 79.54  |  | 95.09  | 87.08  |
| <b>LYN B</b>           | 90.23  | 75.55  |  | 93.42  | 79.97  |
| <b>MAPKAPK2</b>        | 110.75 | 100.39 |  | 79.24  | 89.73  |
| <b>MAPKAPK3</b>        | 109.38 | 101.13 |  | 110.64 | 98.08  |
| <b>MAPKAPK5/PRAK</b>   | 109.07 | 100.77 |  | 116.28 | 102.89 |
| <b>MARK1</b>           | 88.03  | 98.09  |  | 95.22  | 90.13  |
| <b>MARK2/PAR-1Ba</b>   | 89.66  | 90.17  |  | 87.31  | 86.02  |
| <b>MARK3</b>           | 116.95 | 114.25 |  | 71.46  | 76.66  |
| <b>MARK4</b>           | 100.34 | 99.08  |  | 98.40  | 89.73  |
| <b>MEK1</b>            | 101.90 | 89.45  |  | 108.96 | 81.58  |
| <b>MEK2</b>            | 96.14  | 97.85  |  | 97.02  | 105.81 |
| <b>MEKK1</b>           | 102.14 | 96.83  |  | 82.64  | 86.12  |
| <b>MEKK2</b>           | 108.89 | 96.83  |  | 131.53 | 112.60 |
| <b>MEKK3</b>           | 104.81 | 102.21 |  | 126.53 | 101.38 |
| <b>MELK</b>            | 89.08  | 85.02  |  | 86.87  | 79.27  |
| <b>MINK/MINK1</b>      | 92.64  | 88.76  |  | 38.60  | 39.59  |
| <b>MKK6</b>            | 109.51 | 110.41 |  | 102.46 | 105.67 |
| <b>MLCK/MYLK</b>       | 100.76 | 95.26  |  | 101.93 | 98.42  |
| <b>MLCK2/MYLK2</b>     | 68.16  | 67.41  |  | 60.49  | 60.89  |
| <b>MLK1/MAP3K9</b>     | 95.93  | 89.48  |  | 76.39  | 73.49  |
| <b>MLK2/MAP3K10</b>    | 72.30  | 64.86  |  | 81.18  | 73.20  |
| <b>MLK3/MAP3K11</b>    | 74.53  | 74.07  |  | 63.75  | 64.02  |
| <b>MNK1</b>            | 15.98  | 16.23  |  | 103.22 | 102.23 |
| <b>MNK2</b>            | 14.92  | 12.46  |  | 93.76  | 90.99  |
| <b>MRCKa/CDC42BP A</b> | 106.01 | 102.04 |  | 93.65  | 95.22  |
| <b>MRCKb/CDC42BP B</b> | 96.72  | 105.78 |  | 94.12  | 95.62  |
| <b>MSK1/RPS6KA5</b>    | 102.84 | 109.39 |  | 109.55 | 93.08  |
| <b>MSK2/RPS6KA4</b>    | 92.57  | 90.53  |  | 97.89  | 83.39  |
| <b>MSSK1/STK23</b>     | 68.55  | 67.36  |  | 96.23  | 95.29  |
| <b>MST1/STK4</b>       | 111.50 | 112.89 |  | 88.97  | 81.23  |
| <b>MST2/STK3</b>       | 95.70  | 95.66  |  | 97.79  | 93.57  |
| <b>MST3/STK24</b>      | 100.93 | 100.52 |  | 185.62 | 184.43 |
| <b>MST4</b>            | 101.25 | 103.56 |  | 96.33  | 102.09 |
| <b>MUSK</b>            | 93.93  | 86.56  |  | 84.49  | 81.79  |
| <b>MYLK3</b>           | 100.27 | 98.41  |  | 95.19  | 95.60  |
| <b>MYO3b</b>           | 105.03 | 101.97 |  | 71.20  | 68.96  |
| <b>NEK1</b>            | 83.69  | 73.28  |  | 89.11  | 90.04  |
| <b>NEK11</b>           | 108.92 | 111.14 |  | 105.77 | 109.40 |
| <b>NEK2</b>            | 107.08 | 111.08 |  | 92.40  | 90.15  |
| <b>NEK3</b>            | 81.72  | 85.91  |  | 93.03  | 92.66  |
| <b>NEK4</b>            | 82.04  | 88.71  |  | 102.02 | 98.73  |
| <b>NEK6</b>            | 107.57 | 105.57 |  | 97.04  | 102.59 |

|                  |        |        |  |        |        |
|------------------|--------|--------|--|--------|--------|
| NEK7             | 101.83 | 95.44  |  | 99.26  | 95.04  |
| NEK9             | 96.75  | 91.63  |  | 107.01 | 102.80 |
| NIK/MAP3K14      | 102.93 | 116.19 |  | 104.28 | 115.68 |
| NLK              | 106.04 | 100.71 |  | 102.19 | 98.19  |
| OSR1/OXSR1       | 79.16  | 77.89  |  | 82.22  | 85.13  |
| P38a/MAPK14      | 56.78  | 68.07  |  | 95.51  | 100.65 |
| P38b/MAPK11      | 60.26  | 52.39  |  | 99.07  | 91.91  |
| P38d/MAPK13      | 113.42 | 114.63 |  | 81.61  | 81.55  |
| P38g             | 78.98  | 75.69  |  | 30.27  | 29.26  |
| p70S6K/RPS6KB1   | 75.72  | 70.75  |  | 92.50  | 91.52  |
| p70S6Kb/RPS6K B2 | 97.99  | 95.56  |  | 94.18  | 99.05  |
| PAK1             | 105.27 | 102.29 |  | 109.26 | 102.73 |
| PAK2             | 94.13  | 97.28  |  | 98.08  | 82.04  |
| PAK3             | 90.94  | 95.90  |  | 150.13 | 155.68 |
| PAK4             | 105.86 | 109.70 |  | 101.67 | 102.82 |
| PAK5             | 100.88 | 95.53  |  | 99.67  | 91.35  |
| PAK6             | 98.41  | 93.52  |  | 100.11 | 85.67  |
| PASK             | 104.38 | 91.25  |  | 76.27  | 84.51  |
| PBK/TOPK         | 93.13  | 97.51  |  | 83.79  | 89.39  |
| PDGFRa           | 20.88  | 20.79  |  | 85.96  | 83.97  |
| PDGFRb           | 29.04  | 27.60  |  | 84.40  | 90.65  |
| PDK1/PDPK1       | 98.02  | 97.41  |  | 89.47  | 87.69  |
| PHKg1            | 92.34  | 79.59  |  | 87.87  | 80.19  |
| PHKg2            | 107.17 | 112.60 |  | 101.50 | 98.54  |
| PIM1             | 100.77 | 100.85 |  | 91.22  | 94.60  |
| PIM2             | 67.44  | 63.89  |  | 101.86 | 113.70 |
| PIM3             | 86.72  | 97.78  |  | 69.83  | 91.30  |
| PKA              | 104.11 | 98.01  |  | 103.94 | 96.68  |
| PKAcg            | 77.03  | 85.32  |  | 102.79 | 108.86 |
| PKCa             | 109.68 | 77.60  |  | 93.85  | 102.59 |
| PKCb1            | 88.64  | 85.95  |  | 102.45 | 104.05 |
| PKCb2            | 98.29  | 101.18 |  | 100.92 | 95.10  |
| PKCd             | 104.52 | 106.21 |  | 88.36  | 100.92 |
| PKCepsilon       | 97.41  | 92.71  |  | 100.64 | 91.39  |
| PKCeta           | 97.10  | 94.56  |  | 95.28  | 90.85  |
| PKCg             | 94.42  | 88.26  |  | 85.16  | 80.22  |
| PKCiota          | 98.84  | 96.39  |  | 106.27 | 102.91 |
| PKCmu/PRKD1      | 87.66  | 100.85 |  | 90.96  | 86.84  |
| PKCnu/PRKD3      | 92.59  | 83.66  |  | 90.75  | 89.09  |
| PKCtheta         | 104.67 | 107.71 |  | 89.31  | 84.15  |
| PKCzeta          | 100.59 | 109.09 |  | 100.86 | 104.65 |
| PKD2/PRKD2       | 86.78  | 88.35  |  | 89.63  | 95.05  |
| PKG1a            | 113.95 | 113.54 |  | 145.48 | 146.90 |
| PKG1b            | 95.98  | 96.81  |  | 95.71  | 106.83 |
| PKG2/PRKG2       | 85.38  | 89.44  |  | 83.83  | 79.80  |
| PKN1/PRK1        | 91.11  | 106.65 |  | 98.99  | 91.92  |
| PKN2/PRK2        | 113.09 | 111.68 |  | 122.31 | 112.52 |
| PLK1             | 107.78 | 113.60 |  | 102.45 | 98.96  |

|              |        |        |  |        |        |
|--------------|--------|--------|--|--------|--------|
| PLK2         | 72.90  | 82.65  |  | 96.46  | 96.61  |
| PLK3         | 97.63  | 100.90 |  | 96.63  | 94.91  |
| PLK4/SAK     | 76.88  | 61.00  |  | 111.62 | 95.80  |
| PRKX         | 103.75 | 100.22 |  | 94.51  | 98.69  |
| PYK2         | 95.73  | 96.06  |  | 88.72  | 88.85  |
| RAF1         | 21.09  | 17.76  |  | 111.17 | 102.98 |
| RET          | 3.02   | 2.45   |  | 79.82  | 55.26  |
| RIPK2        | 46.11  | 48.39  |  | 83.86  | 87.03  |
| RIPK5        | 99.12  | 97.26  |  | 104.97 | 101.48 |
| ROCK1        | 105.60 | 83.38  |  | 104.28 | 94.17  |
| ROCK2        | 64.60  | 62.57  |  | 107.01 | 102.86 |
| RON/MST1R    | 60.46  | 58.23  |  | 83.67  | 83.02  |
| ROS/ROS1     | 95.36  | 83.18  |  | 80.38  | 77.29  |
| RSK1         | 76.49  | 83.12  |  | 74.91  | 80.15  |
| RSK2         | 89.49  | 91.75  |  | 79.66  | 88.38  |
| RSK3         | 93.39  | 82.69  |  | 98.32  | 99.44  |
| RSK4         | 87.89  | 94.11  |  | 85.99  | 87.16  |
| SGK1         | 90.25  | 94.03  |  | 87.78  | 91.76  |
| SGK2         | 99.44  | 106.12 |  | 97.65  | 99.26  |
| SGK3/SGKL    | 102.99 | 101.55 |  | 97.03  | 87.45  |
| SIK1         | 98.49  | 101.75 |  | 93.33  | 99.05  |
| SIK2         | 99.58  | 96.91  |  | 92.89  | 94.82  |
| SLK/STK2     | 76.12  | 71.40  |  | 76.59  | 76.03  |
| SNARK/NUAK2  | 101.25 | 97.94  |  | 136.12 | 137.23 |
| SRMS         | 114.53 | 106.85 |  | 108.05 | 104.67 |
| SRPK1        | 97.84  | 89.99  |  | 92.63  | 101.71 |
| SRPK2        | 55.97  | 70.26  |  | 62.33  | 79.92  |
| STK16        | 104.14 | 104.28 |  | 97.91  | 93.79  |
| STK22D/TSSK1 | 106.73 | 100.29 |  | 92.27  | 86.22  |
| STK25/YSK1   | 79.78  | 79.40  |  | 96.37  | 91.26  |
| STK33        | 75.24  | 75.36  |  | 92.66  | 91.72  |
| STK38/NDR1   | 104.40 | 95.54  |  | 103.53 | 99.08  |
| STK38L/NDR2  | 73.85  | 73.76  |  | 90.33  | 89.11  |
| STK39/STLK3  | 99.03  | 84.63  |  | 93.67  | 86.09  |
| SYK          | 95.14  | 98.30  |  | 86.48  | 87.74  |
| TAK1         | 124.58 | 112.33 |  | 30.22  | 26.24  |
| TAOK1        | 91.47  | 90.74  |  | 125.48 | 124.42 |
| TAOK2/TAO1   | 39.51  | 36.38  |  | 49.99  | 46.98  |
| TAOK3/JIK    | 98.66  | 85.13  |  | 95.25  | 98.61  |
| TBK1         | 101.16 | 106.68 |  | 100.94 | 111.66 |
| TEC          | 83.05  | 92.32  |  | 107.47 | 90.28  |
| TGFBR2       | 87.07  | 89.27  |  | 115.96 | 113.06 |
| TIE2/TEK     | 66.31  | 57.26  |  | 104.64 | 99.16  |
| TLK1         | 112.02 | 104.48 |  | 112.76 | 115.31 |
| TLK2         | 97.94  | 102.98 |  | 105.85 | 103.68 |
| TNK1         | 59.16  | 54.11  |  | 68.33  | 62.16  |
| TRKA         | 13.68  | 12.48  |  | 3.09   | 4.86   |
| TRKB         | 33.63  | 34.82  |  | 11.63  | 9.40   |
| TRKC         | 14.47  | 12.78  |  | 7.85   | 5.51   |

|                     |        |        |  |        |        |
|---------------------|--------|--------|--|--------|--------|
| <b>TSSK2</b>        | 85.07  | 84.01  |  | 83.58  | 88.62  |
| <b>TSSK3/STK22C</b> | 114.32 | 108.19 |  | 84.39  | 93.17  |
| <b>TTK</b>          | 92.68  | 88.84  |  | 87.08  | 126.90 |
| <b>TXK</b>          | 102.65 | 97.58  |  | 101.50 | 104.62 |
| <b>TYK1/LTK</b>     | 84.17  | 87.25  |  | 94.84  | 89.21  |
| <b>TYK2</b>         | 91.88  | 96.85  |  | 88.38  | 94.19  |
| <b>TYRO3/SKY</b>    | 85.98  | 80.43  |  | 93.72  | 92.51  |
| <b>ULK1</b>         | 104.31 | 109.71 |  | 116.83 | 111.20 |
| <b>ULK2</b>         | 80.09  | 82.21  |  | 94.88  | 79.23  |
| <b>ULK3</b>         | 88.67  | 79.77  |  | 79.26  | 79.65  |
| <b>VRK1</b>         | 109.67 | 106.76 |  | 114.74 | 115.04 |
| <b>VRK2</b>         | 79.89  | 105.34 |  | 81.00  | 79.70  |
| <b>WEE1</b>         | 79.84  | 83.99  |  | 98.41  | 91.23  |
| <b>WNK1</b>         | 88.17  | 81.23  |  | 87.49  | 89.62  |
| <b>WNK2</b>         | 97.68  | 97.65  |  | 87.74  | 88.72  |
| <b>WNK3</b>         | 100.45 | 98.37  |  | 103.62 | 100.95 |
| <b>YES/YES1</b>     | 100.09 | 94.40  |  | 99.97  | 97.29  |
| <b>ZAK/MLTK</b>     | 83.93  | 71.09  |  | 105.47 | 92.50  |
| <b>ZAP70</b>        | 99.77  | 90.02  |  | 113.02 | 113.28 |
| <b>ZIPK/DAPK3</b>   | 84.86  | 82.76  |  | 164.90 | 83.38  |
